# Supplementary material for: Acid-catalyzed tandem reaction for the synthesis of pyridine derivatives via CC/C(sp3)–N bond cleavage of enones and primary amines
Source: Royal Society of Chemistry journal article supplement (doi:10.1039/c7ra00780a), 2017-01-01

# Supporting Information

## Acid-Catalyzed Tandem Reaction for the Synthesis of Pyridine Derivatives *via* C=C/C(sp<sup>3</sup>)-N Bond Cleavage of Enones and Primary Amines

Zhong-yuan Mao, Xiao-yun Liao, Heng-shan Wang, Chun-gu Wang, Ke-bin Huang\* and  
Ying-ming Pan\*

*State Key Laboratory for Chemistry and Molecular Engineering of Medicinal Resources, School  
of Chemistry and Pharmaceutical Sciences of Guangxi Normal University, Guilin 541004, China  
Phone: (+86)-773-5846279; fax: (+86)-773-5803930;  
E-mail: hkg2003@163.com, panym2013@hotmail.com.*

$^1\text{H}$  NMR spectrum of **3a**

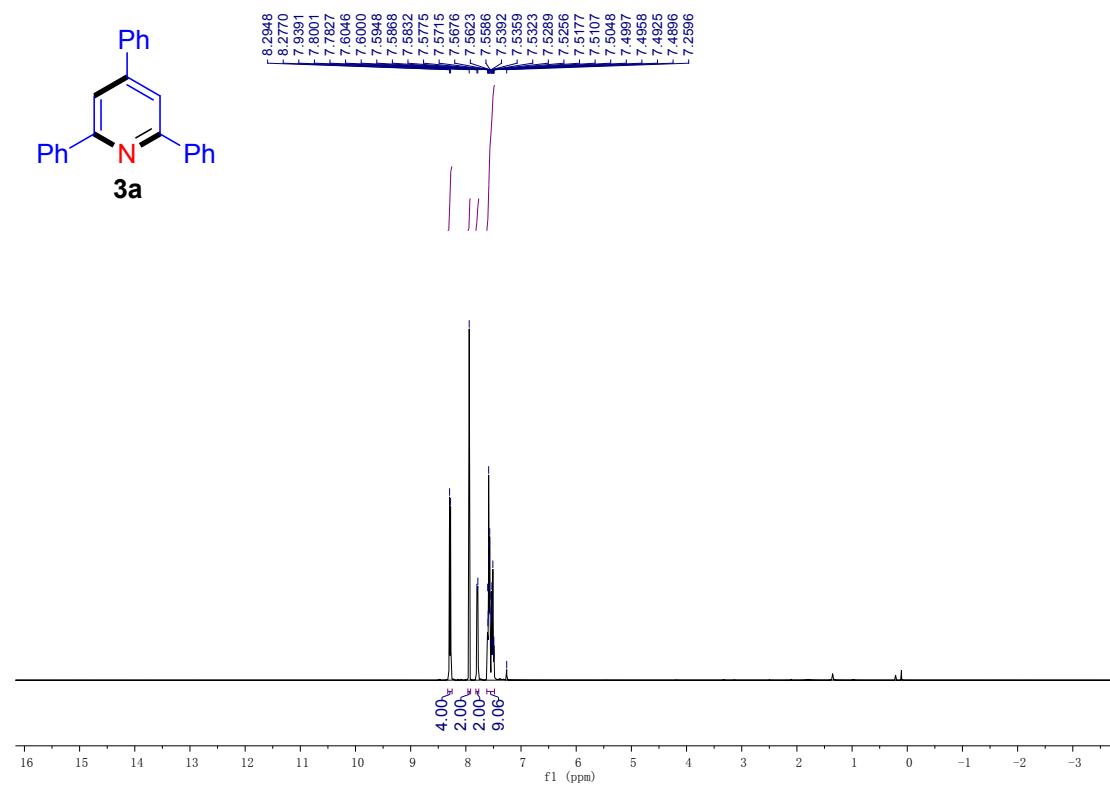

$^{13}\text{C}$  NMR spectrum of **3a**

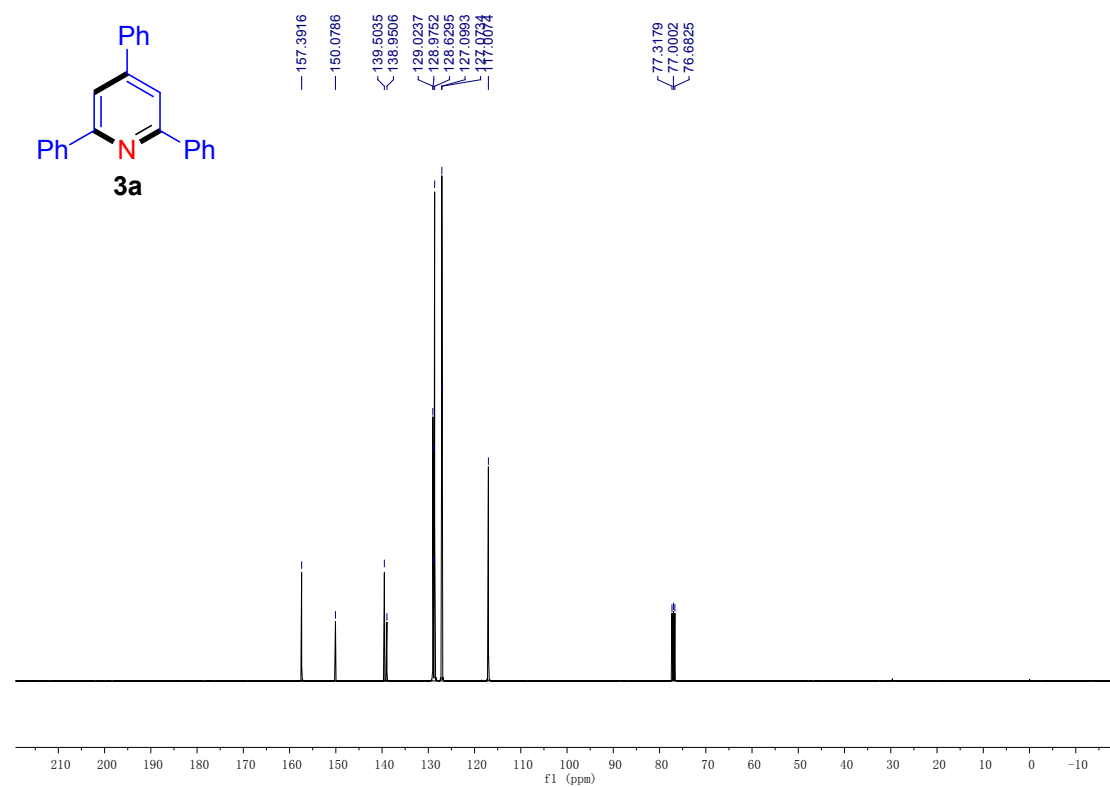

### $^1\text{H}$ NMR spectrum of **3b**

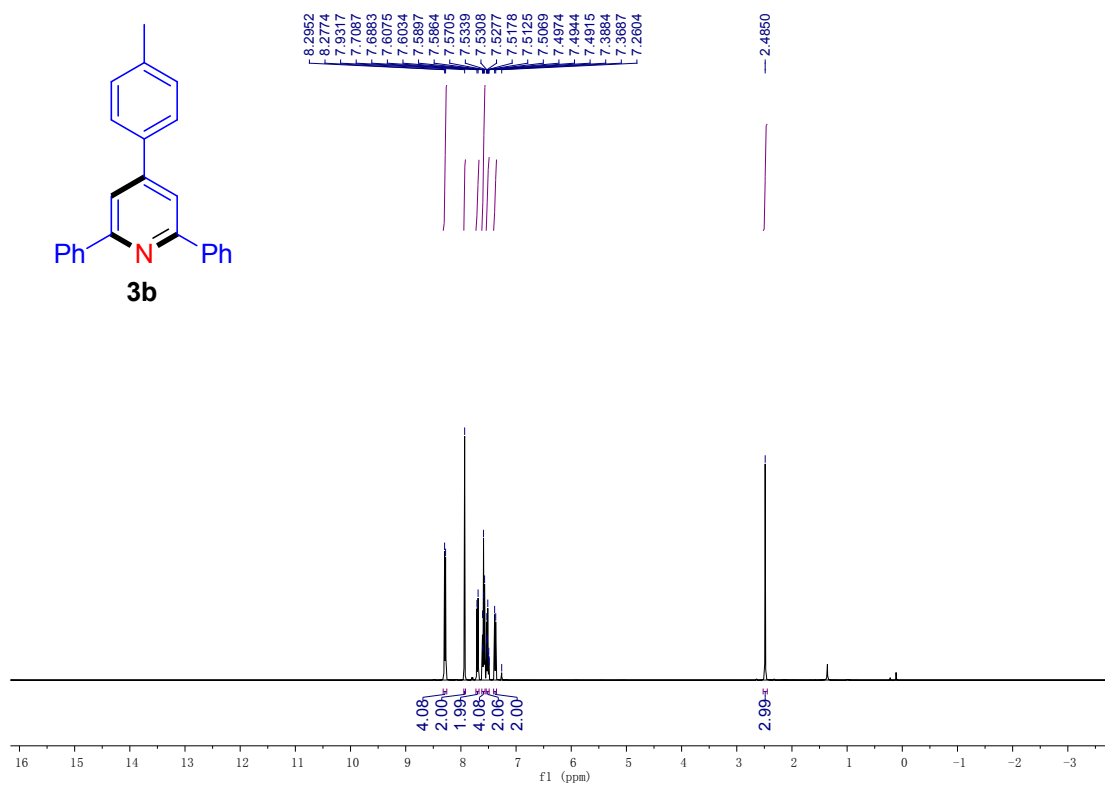

### $^{13}\text{C}$ NMR spectrum of **3b**

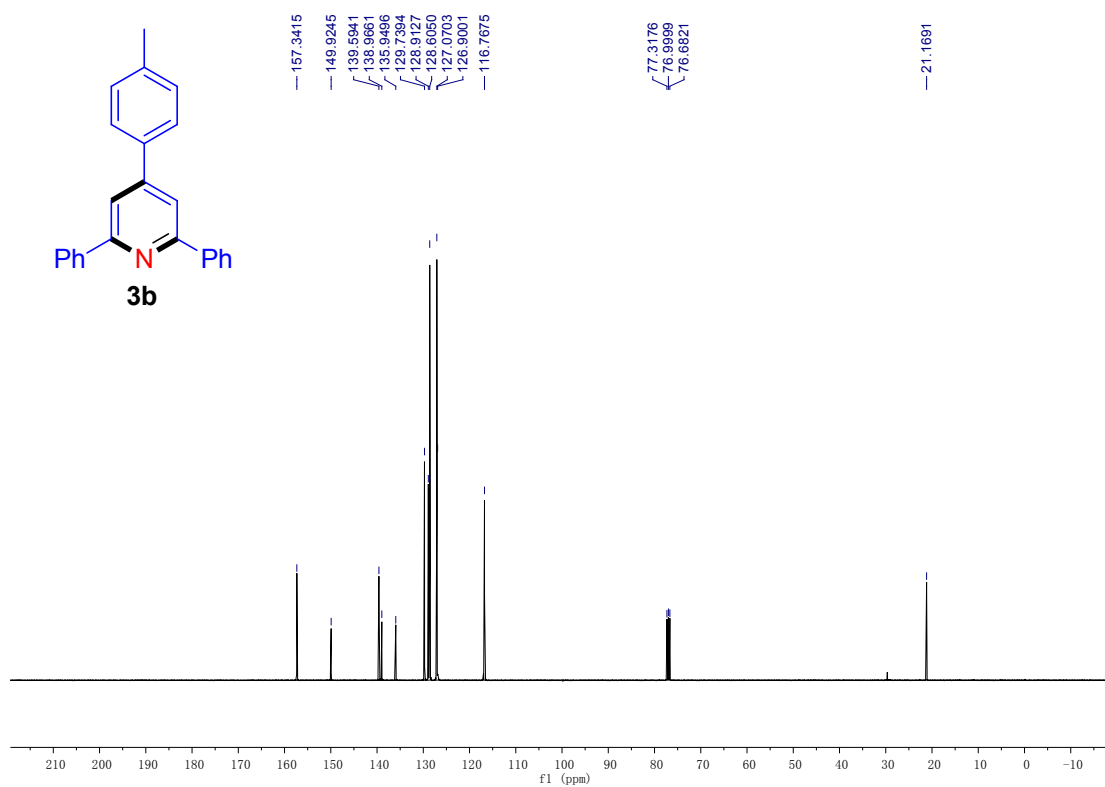

<sup>1</sup>H NMR spectrum of **3c**

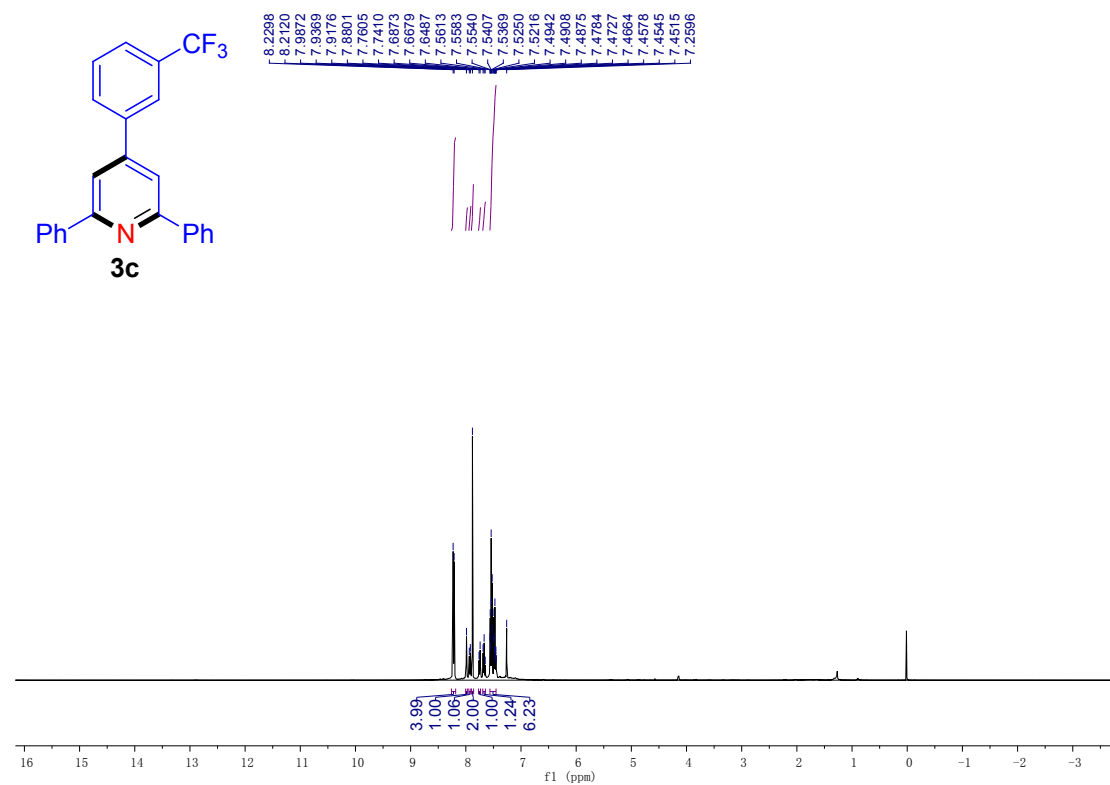

<sup>13</sup>C NMR spectrum of **3c**

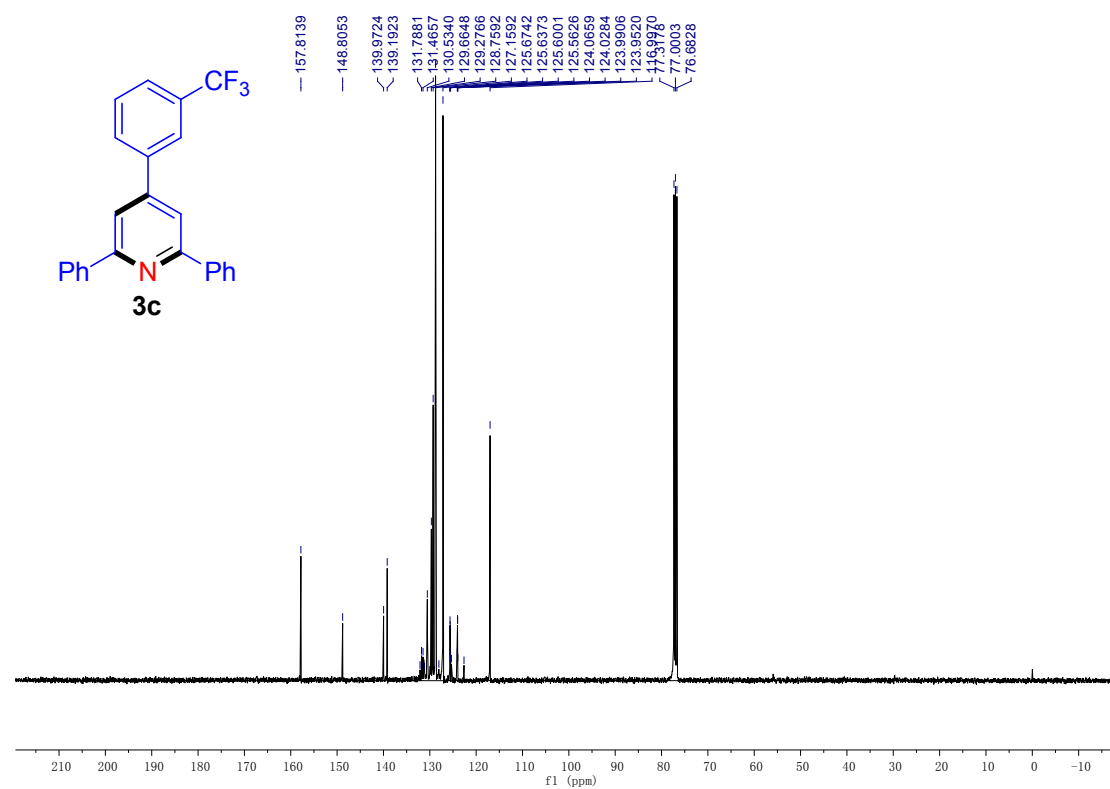

### <sup>1</sup>H NMR spectrum of **3d**

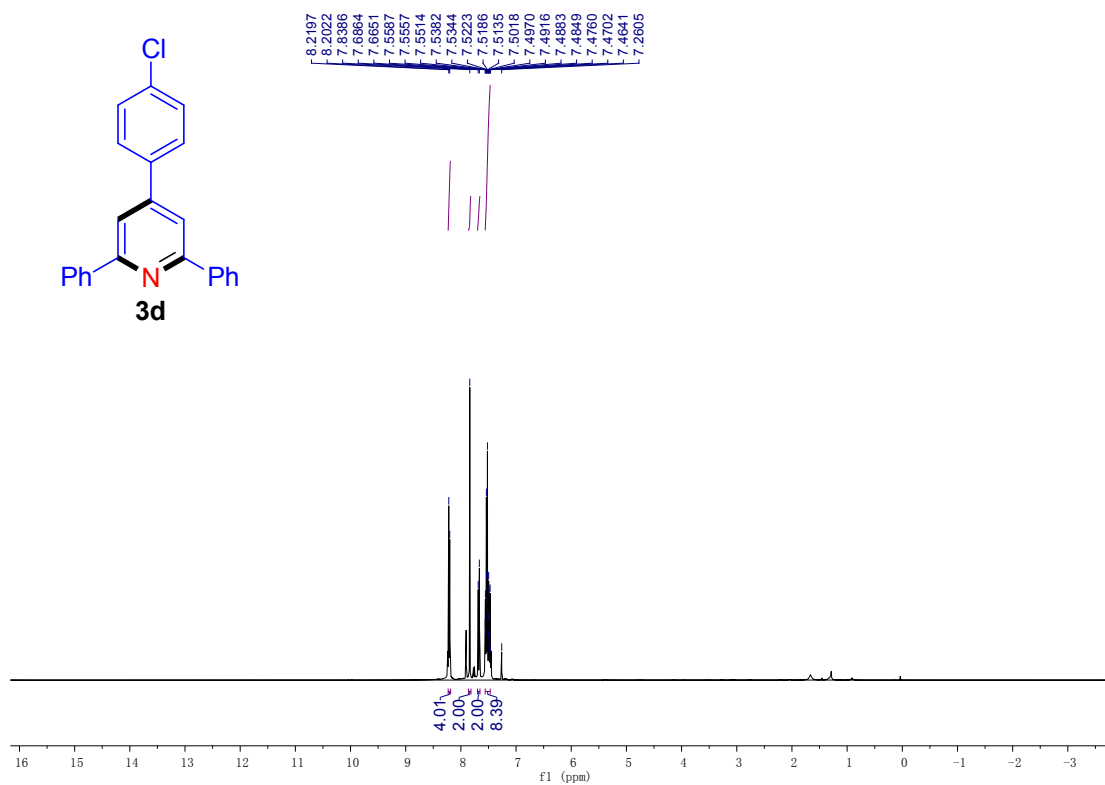

### <sup>13</sup>C NMR spectrum of **3d**

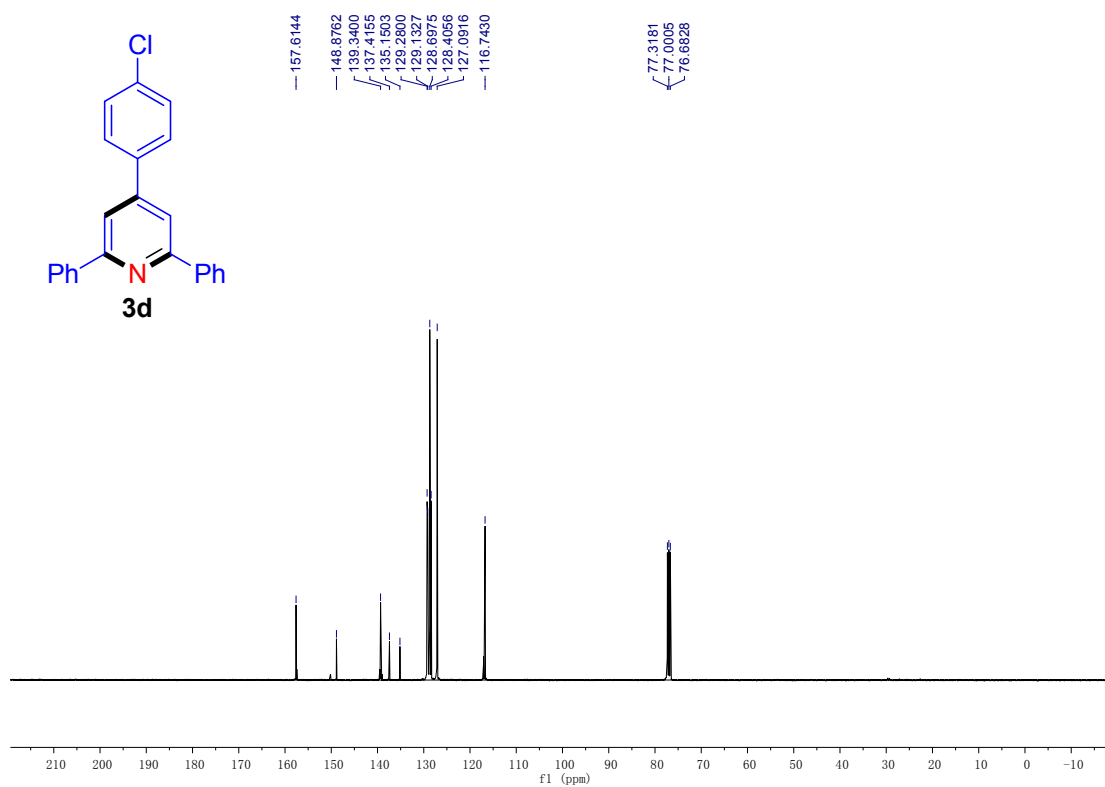

### $^1\text{H}$ NMR spectrum of **3e**

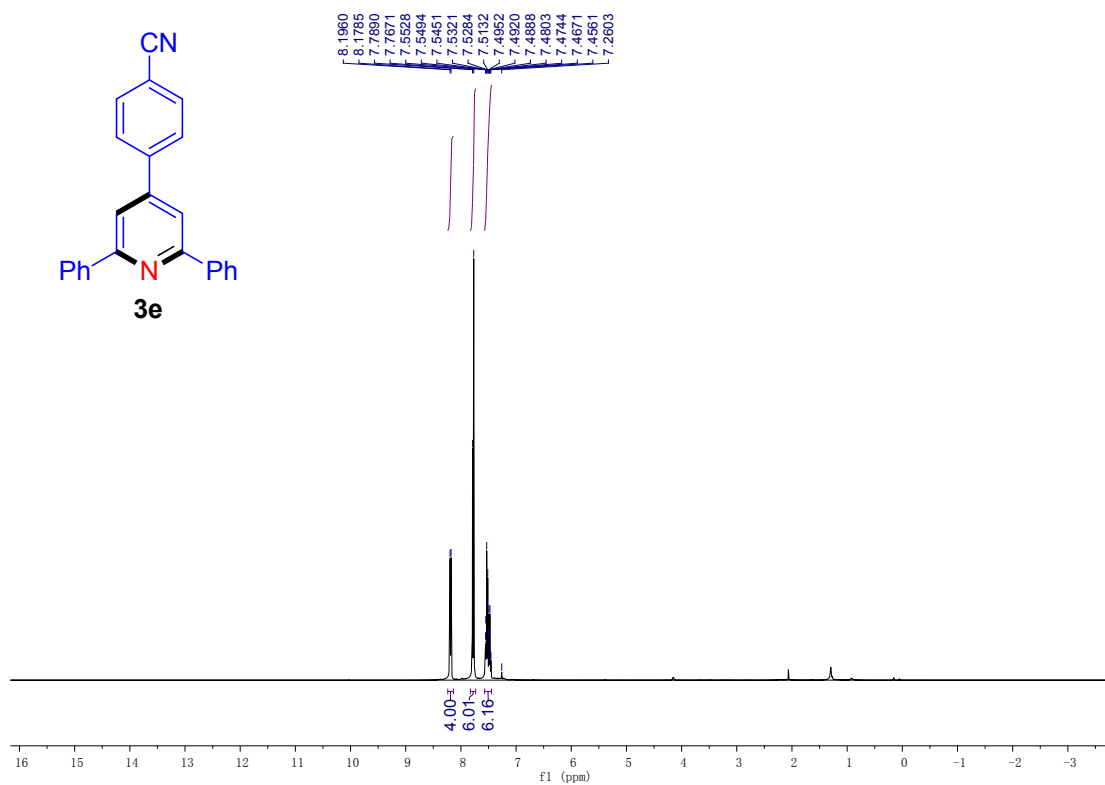

### $^{13}\text{C}$ NMR spectrum of **3e**

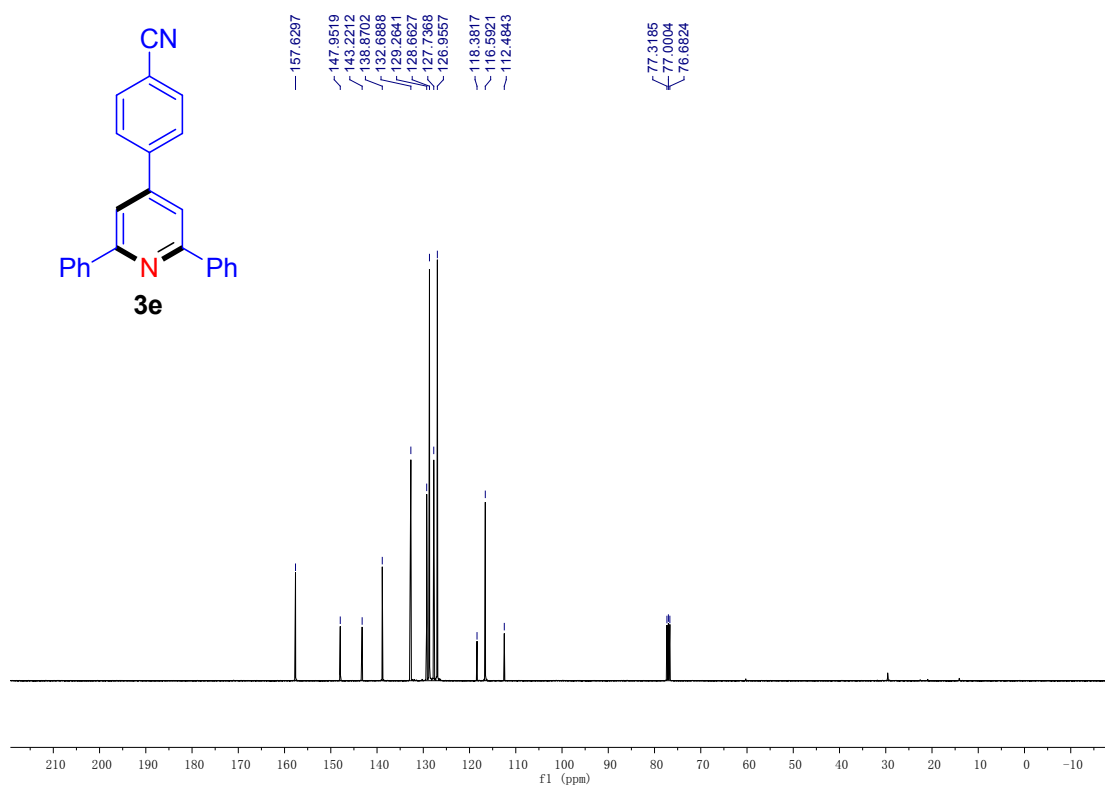

$^1\text{H}$  NMR spectrum of **3f**

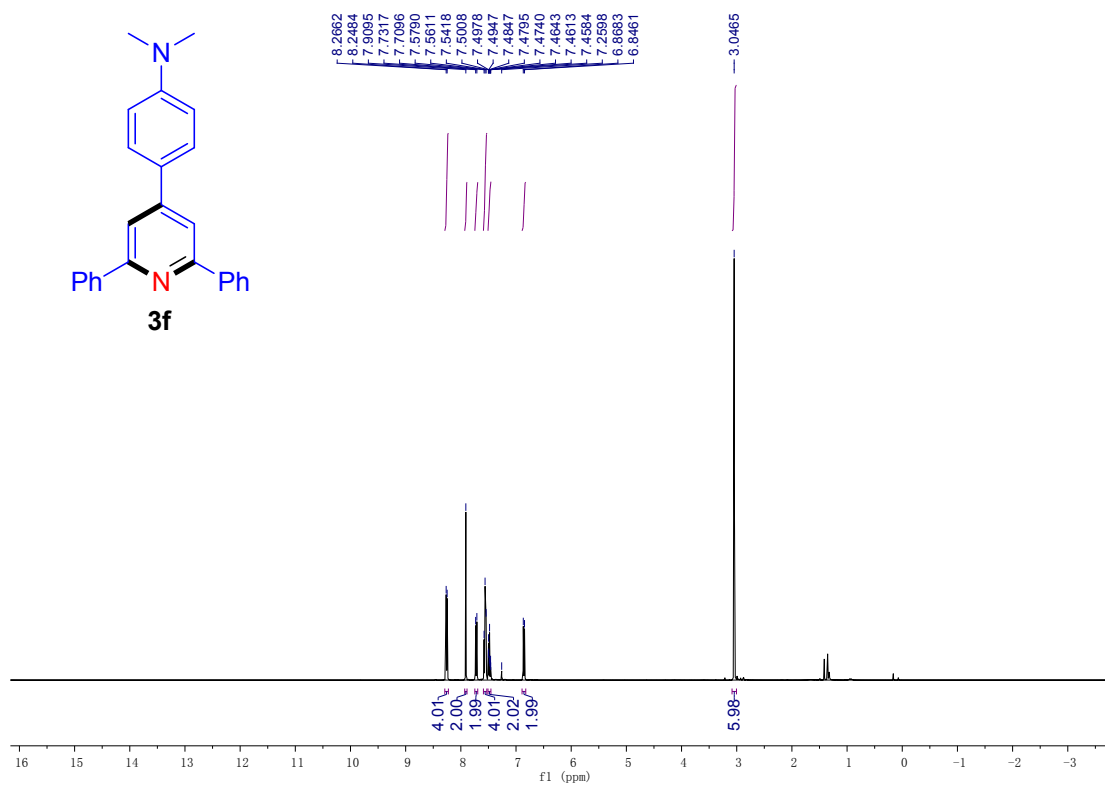

$^{13}\text{C}$  NMR spectrum of **3f**

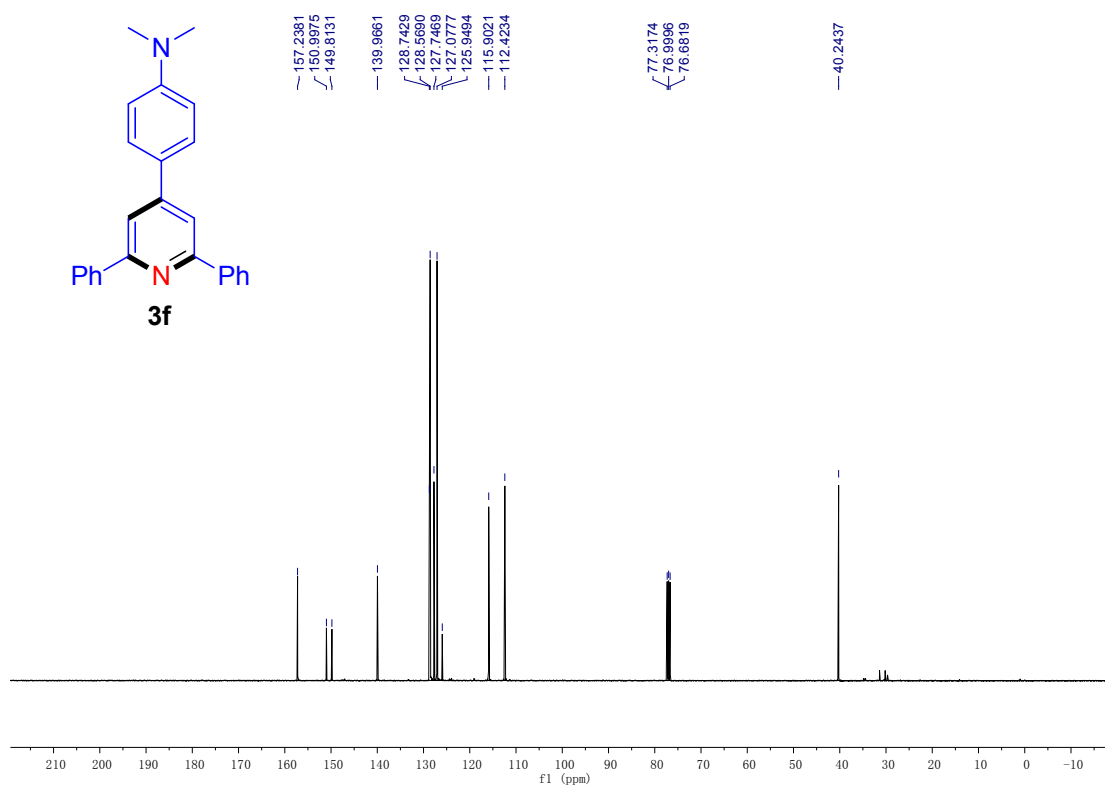

### $^1\text{H}$ NMR spectrum of **3g**

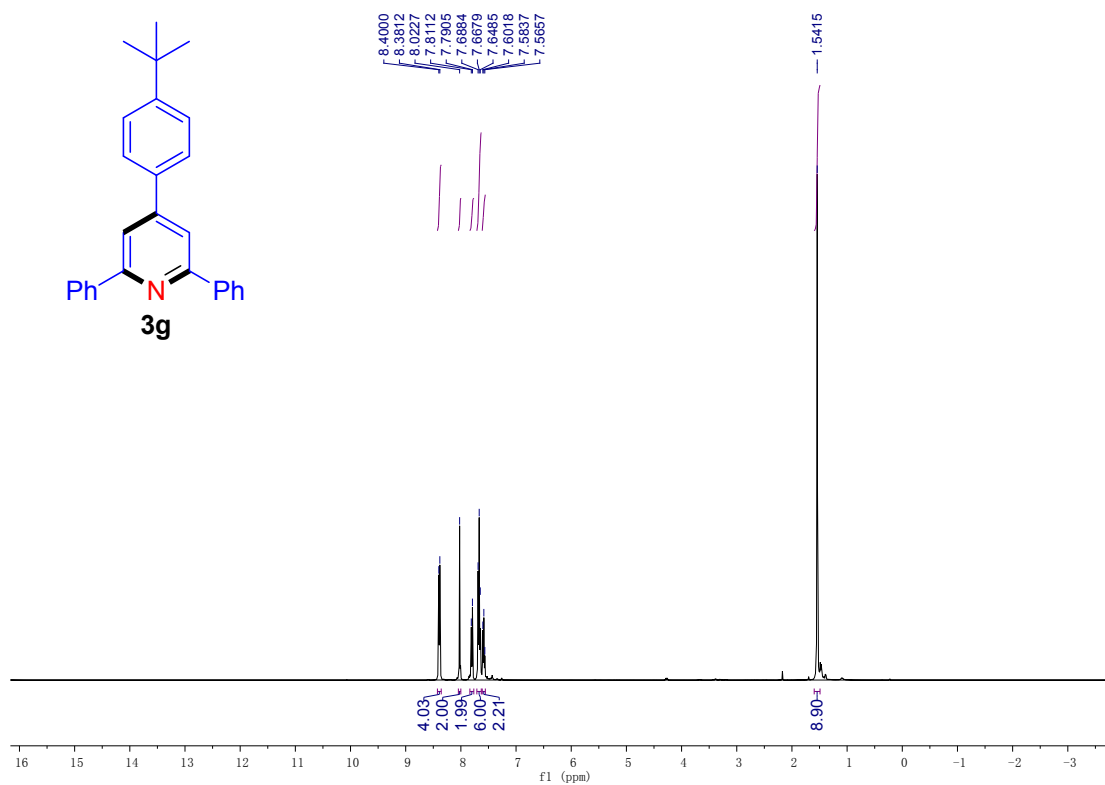

### $^{13}\text{C}$ NMR spectrum of **3g**

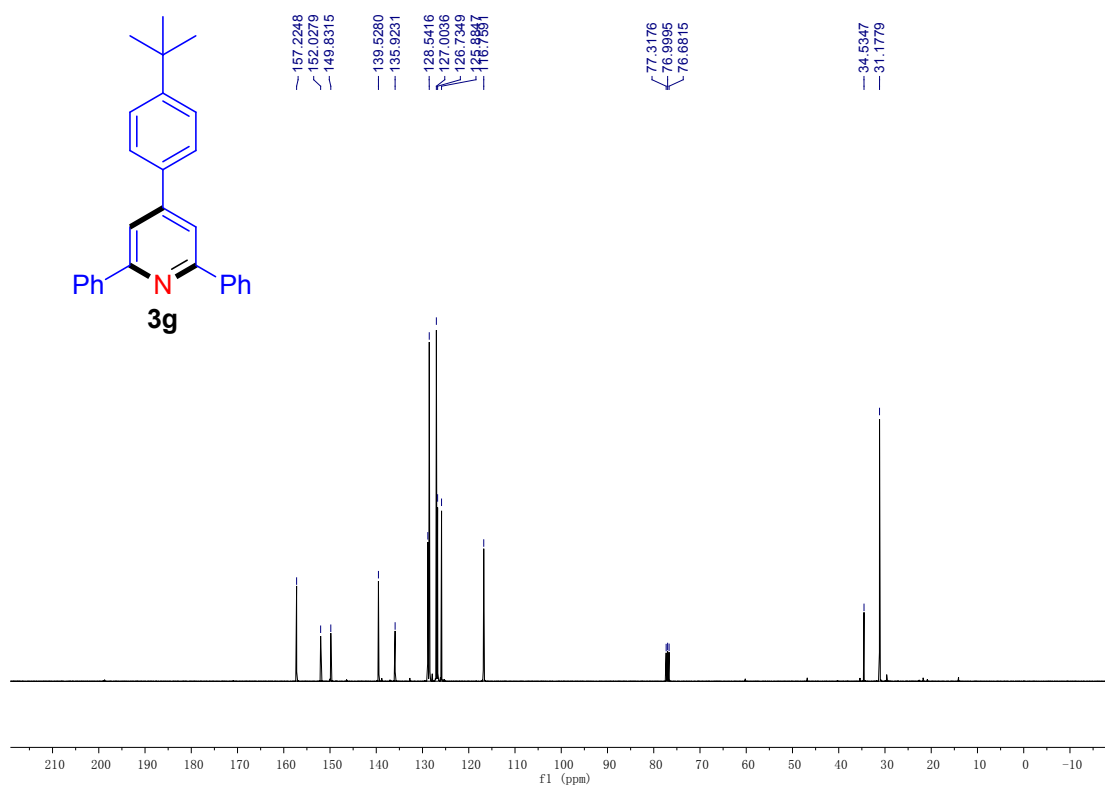



$^1\text{H}$  NMR spectrum of **3h**

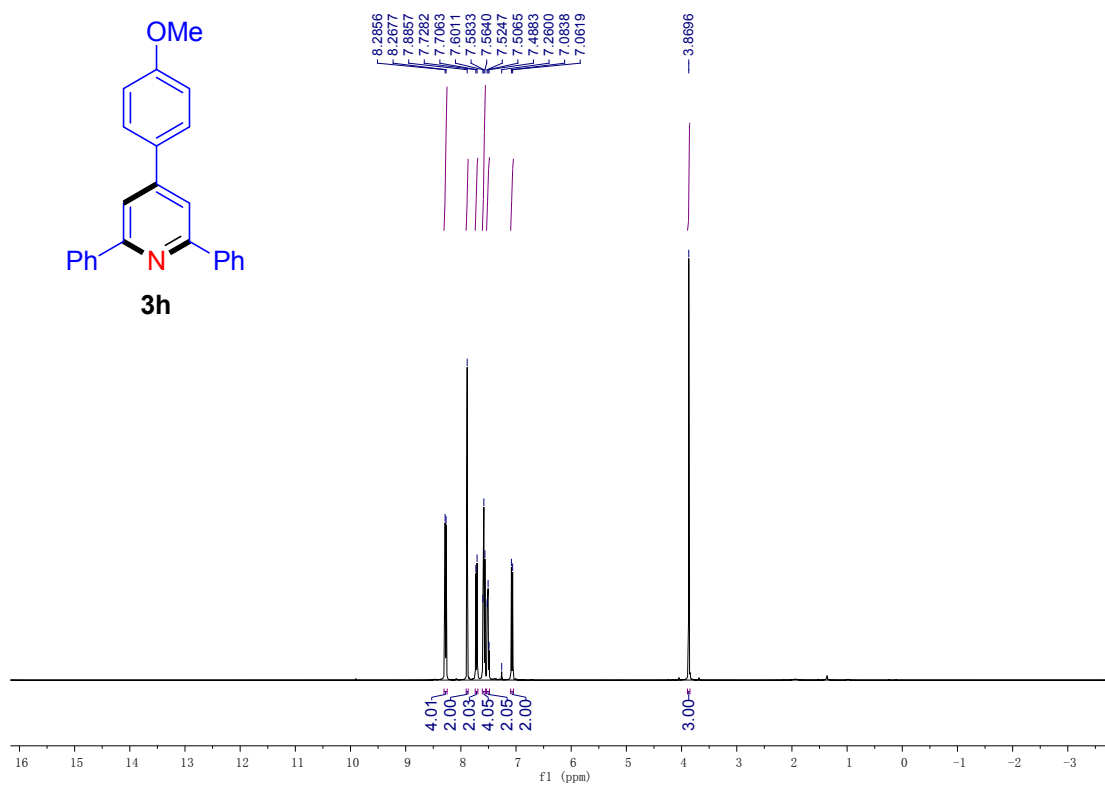

$^{13}\text{C}$  NMR spectrum of **3h**

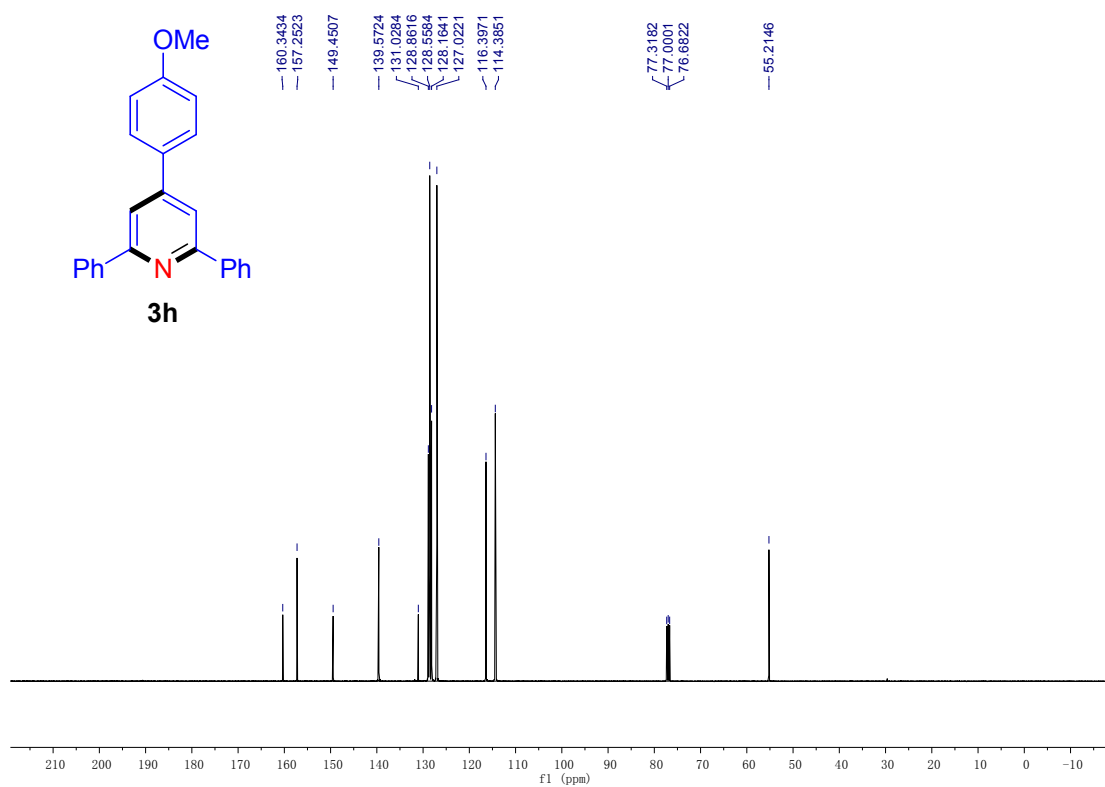

<sup>1</sup>H NMR spectrum of **3i**

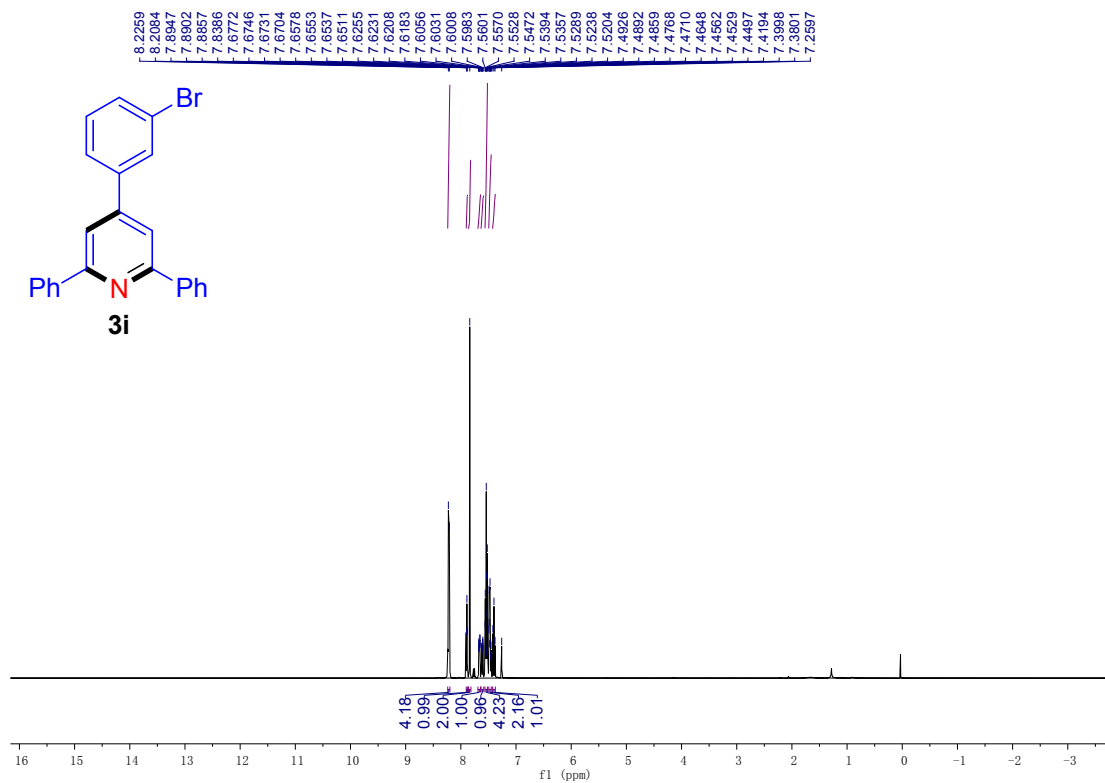

<sup>13</sup>C NMR spectrum of **3i**

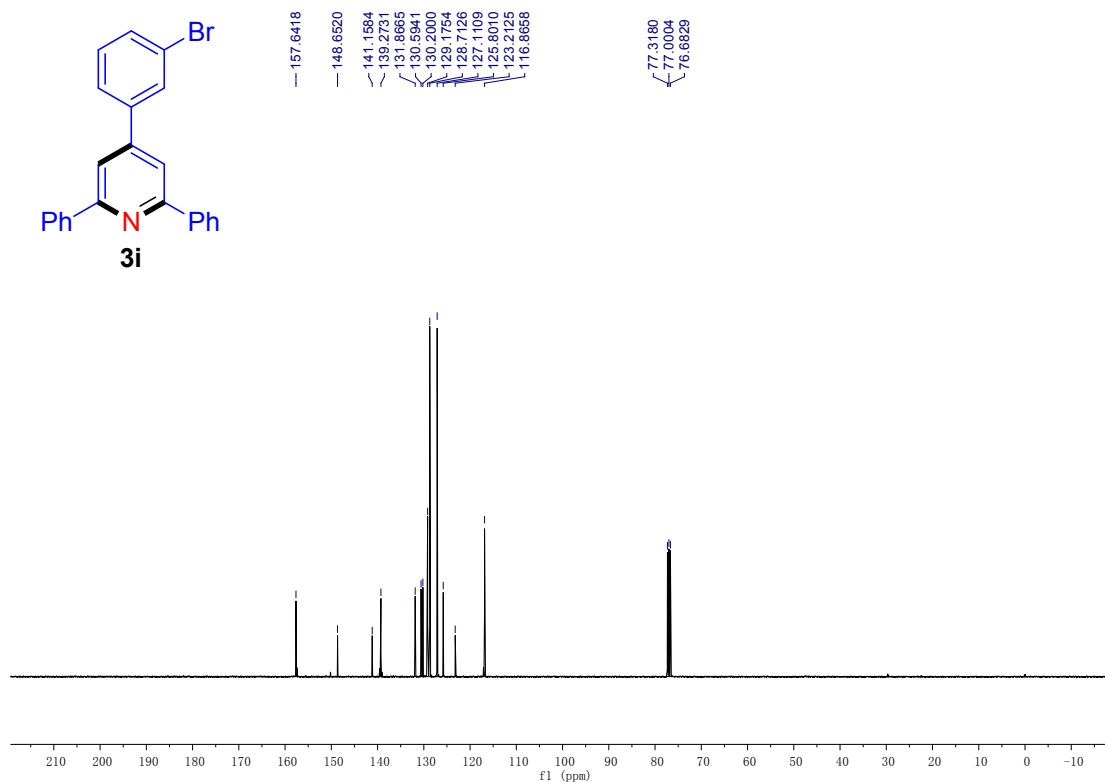

<sup>1</sup>H NMR spectrum of **3j**

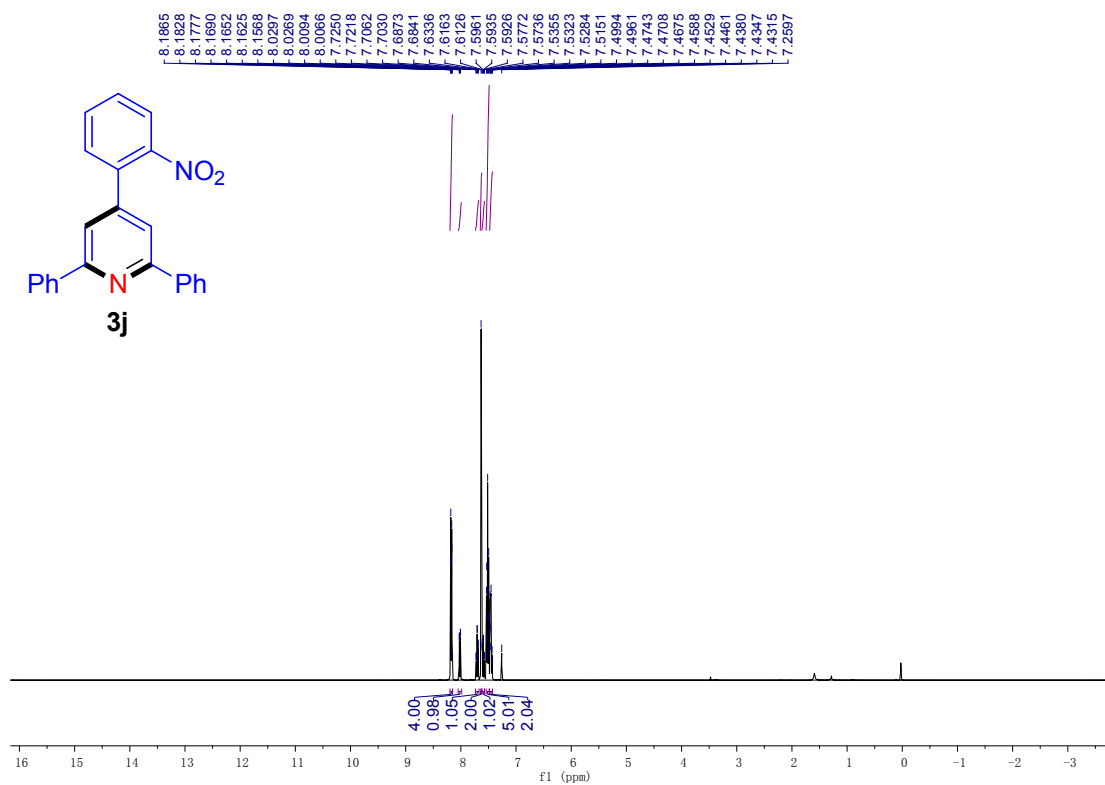

<sup>13</sup>C NMR spectrum of **3j**

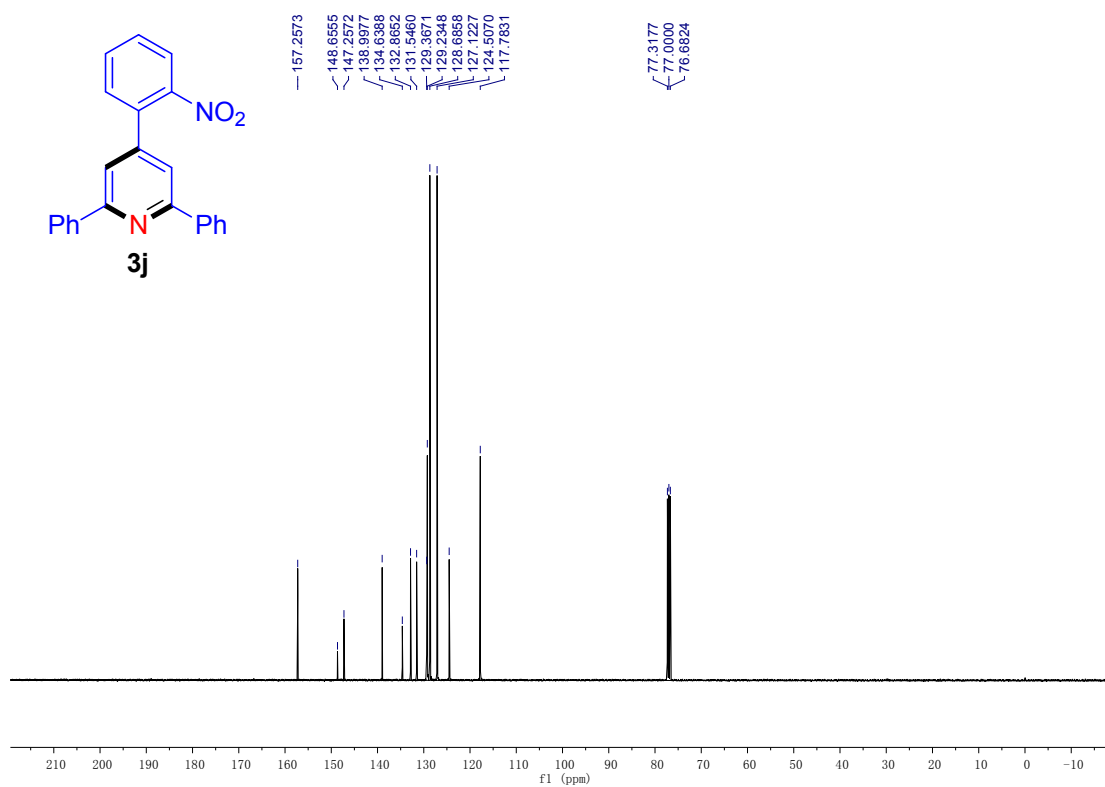

### <sup>1</sup>H NMR spectrum of **3k**

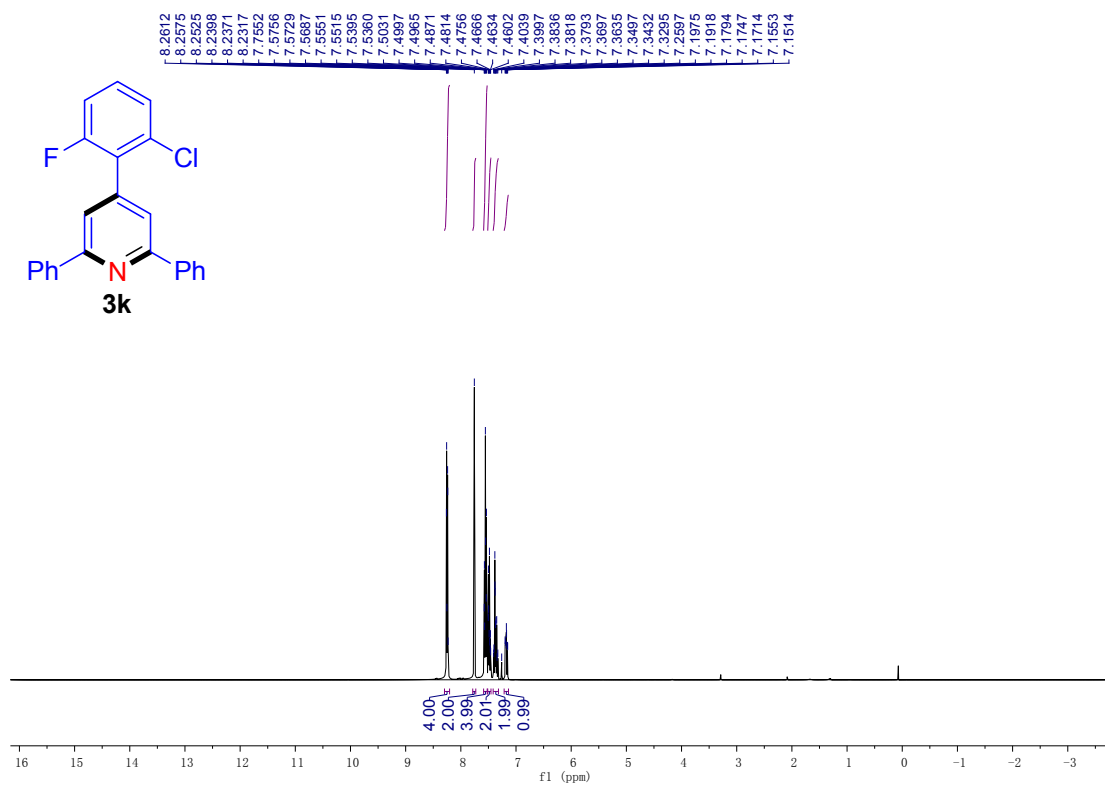

### <sup>13</sup>C NMR spectrum of **3k**

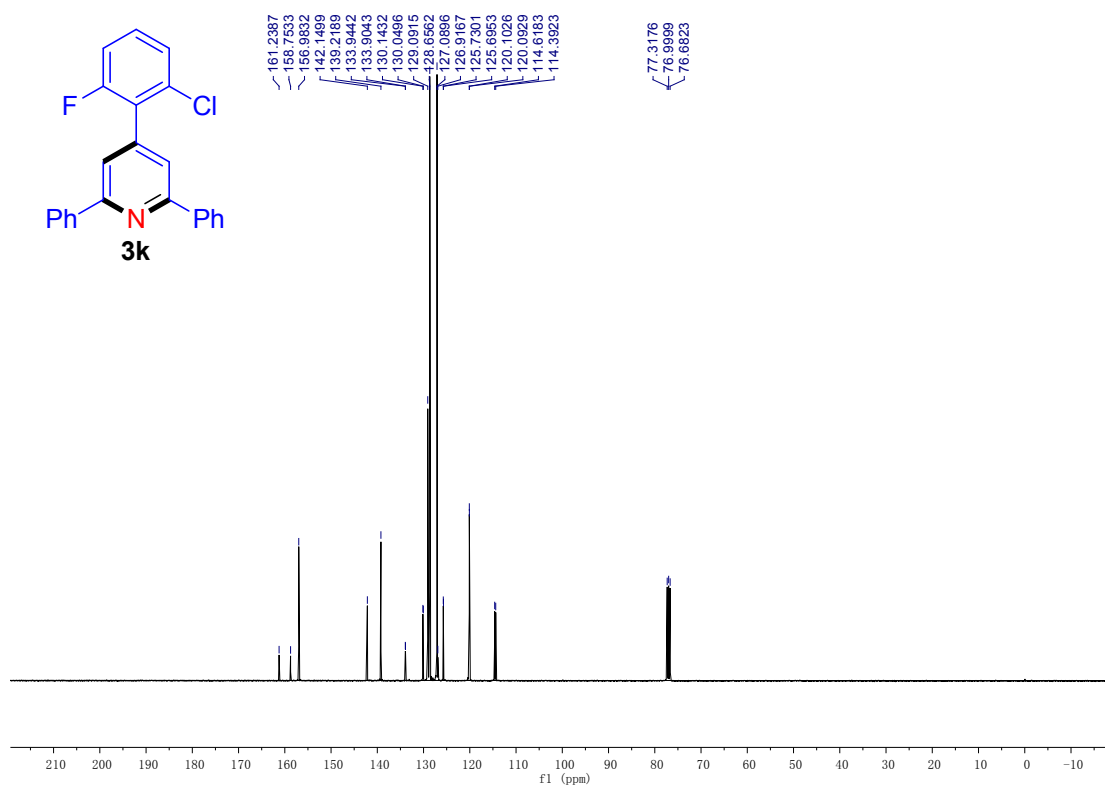

<sup>1</sup>H NMR spectrum of **31**

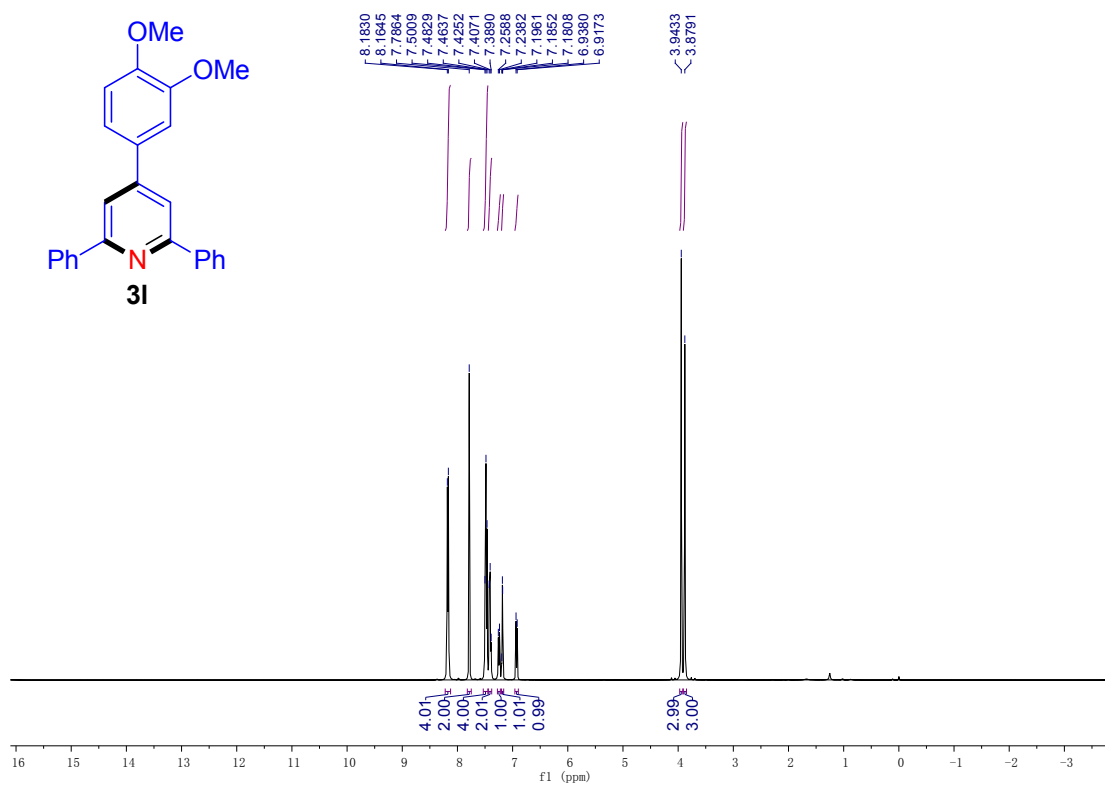

<sup>13</sup>C NMR spectrum of **31**

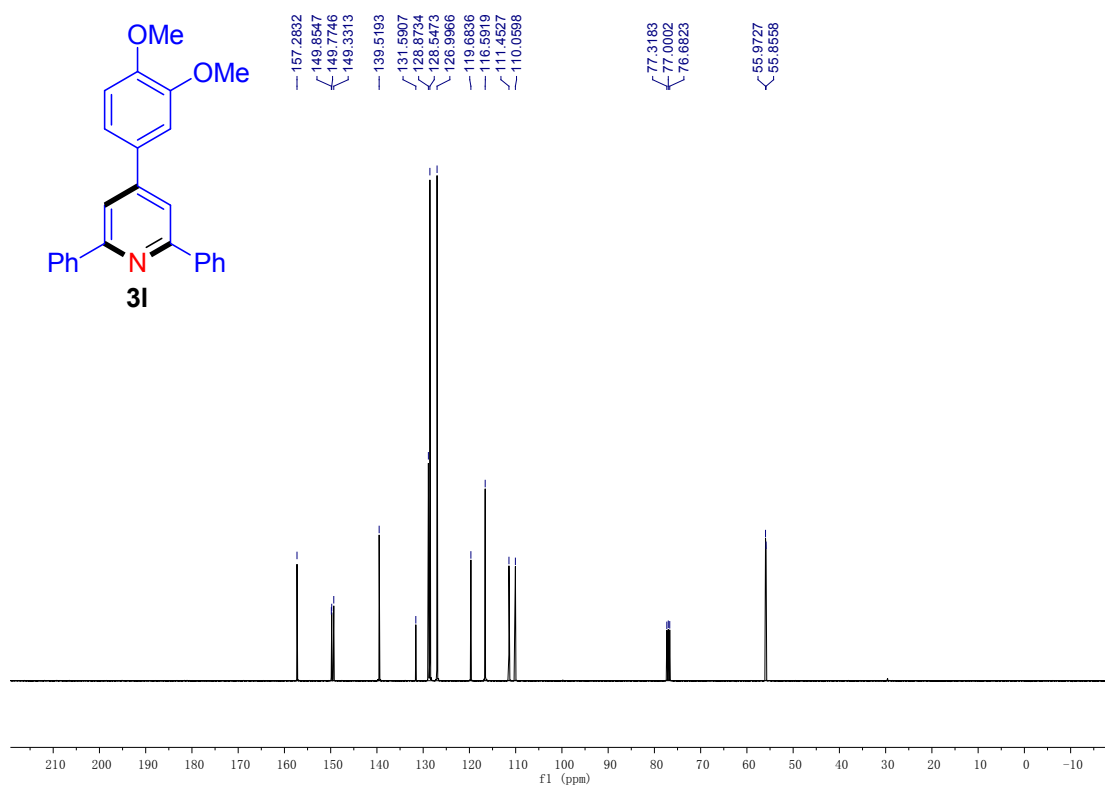

<sup>1</sup>H NMR spectrum of **3m**

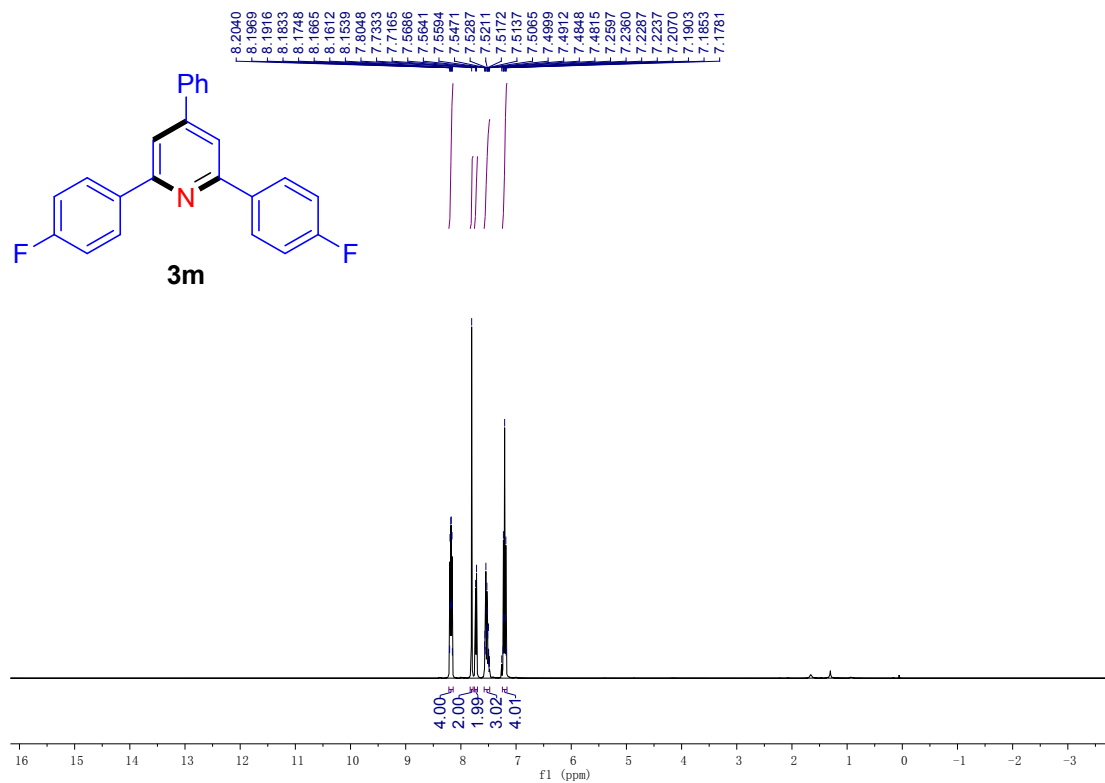

<sup>13</sup>C NMR spectrum of **3m**

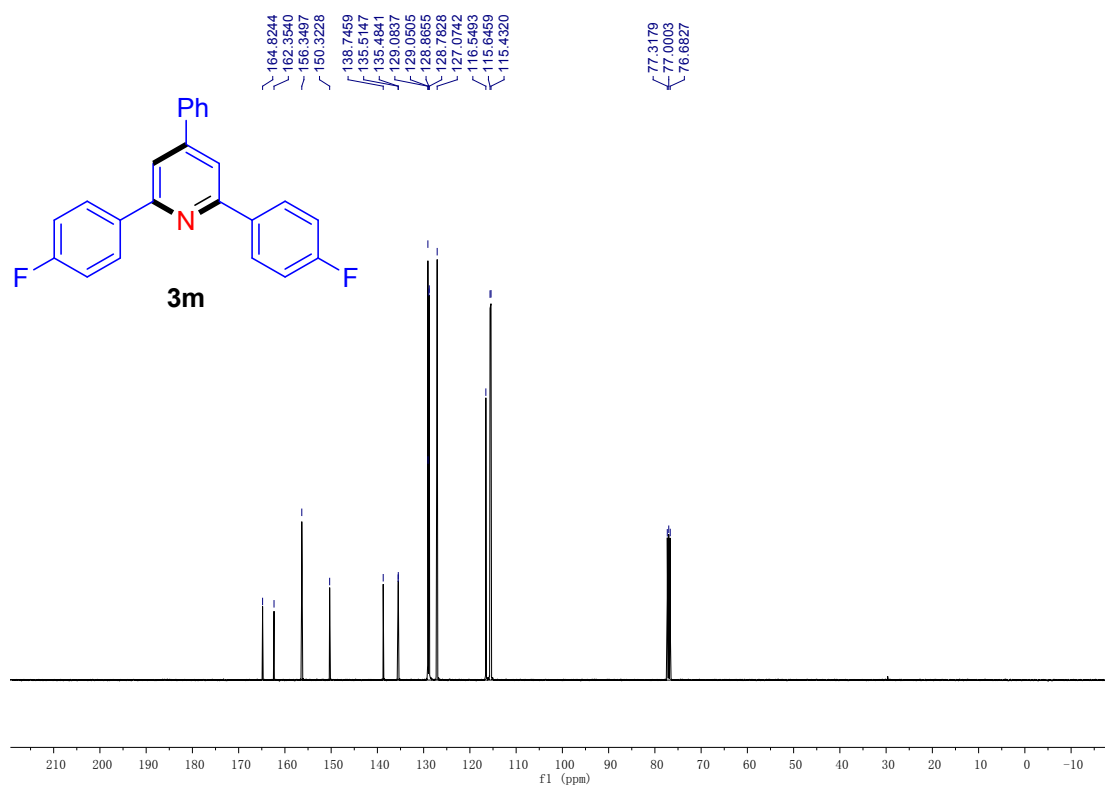

<sup>1</sup>H NMR spectrum of **3n**

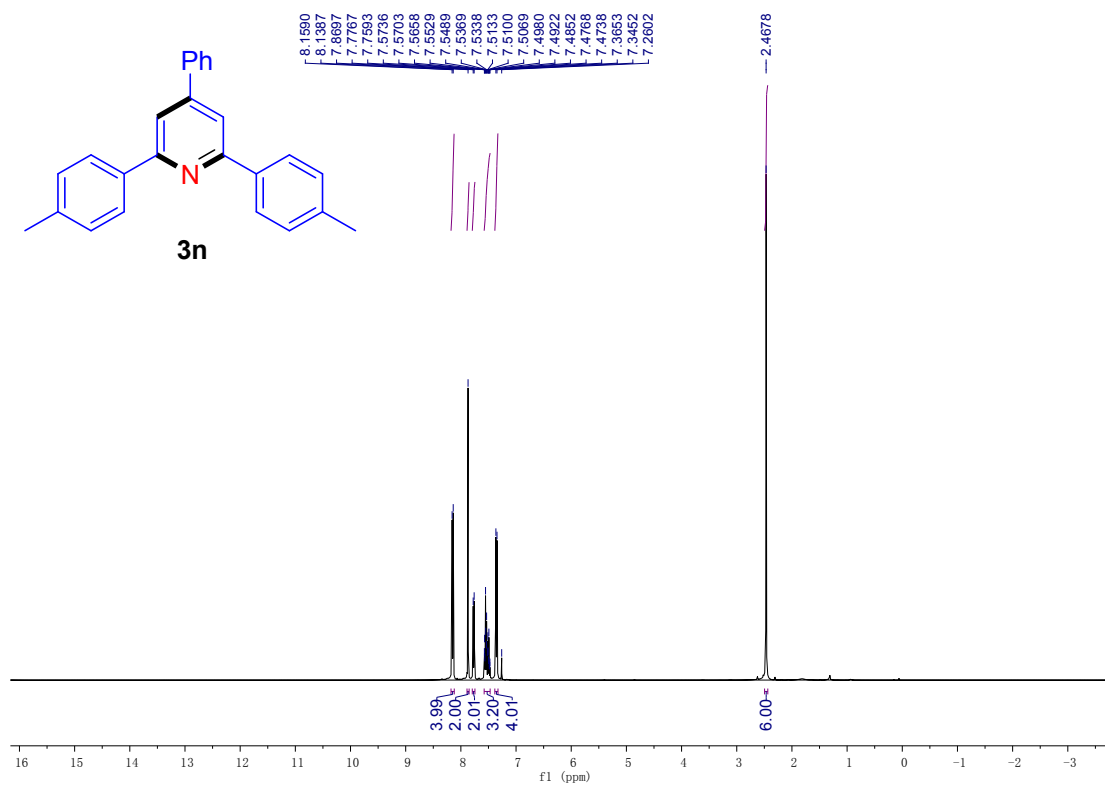

<sup>13</sup>C NMR spectrum of **3n**

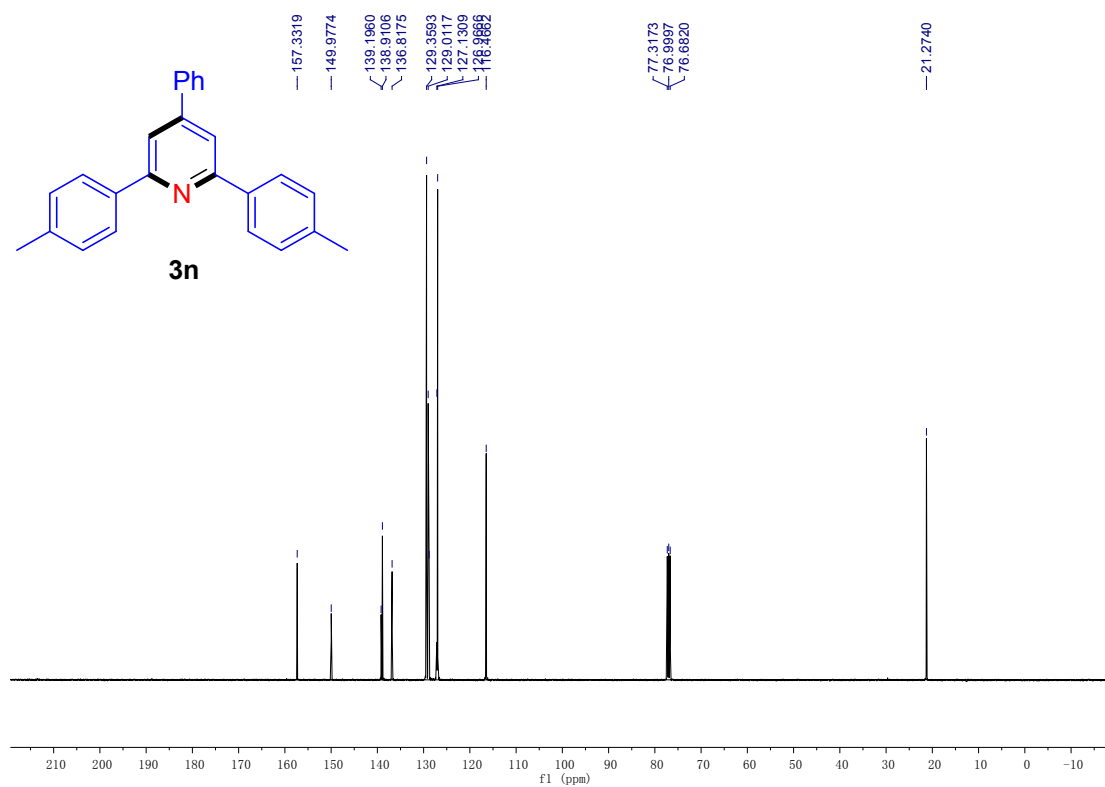

### $^1\text{H}$ NMR spectrum of **3o**

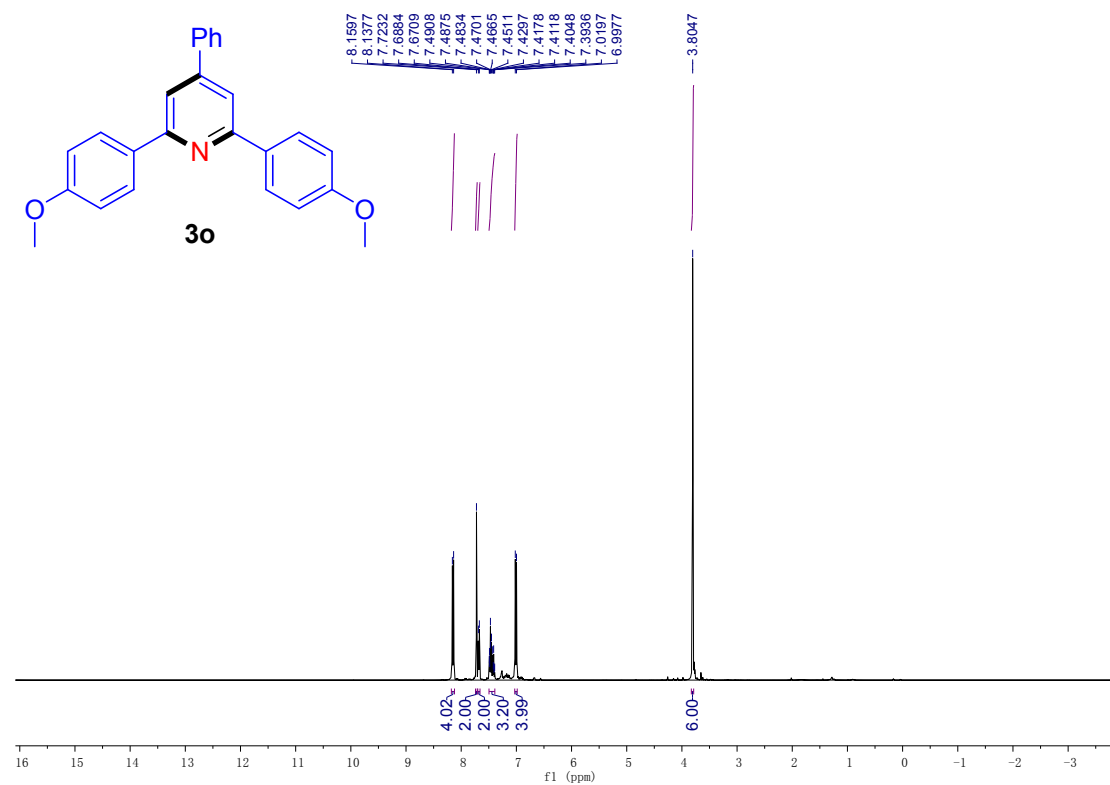

### $^{13}\text{C}$ NMR spectrum of **3o**

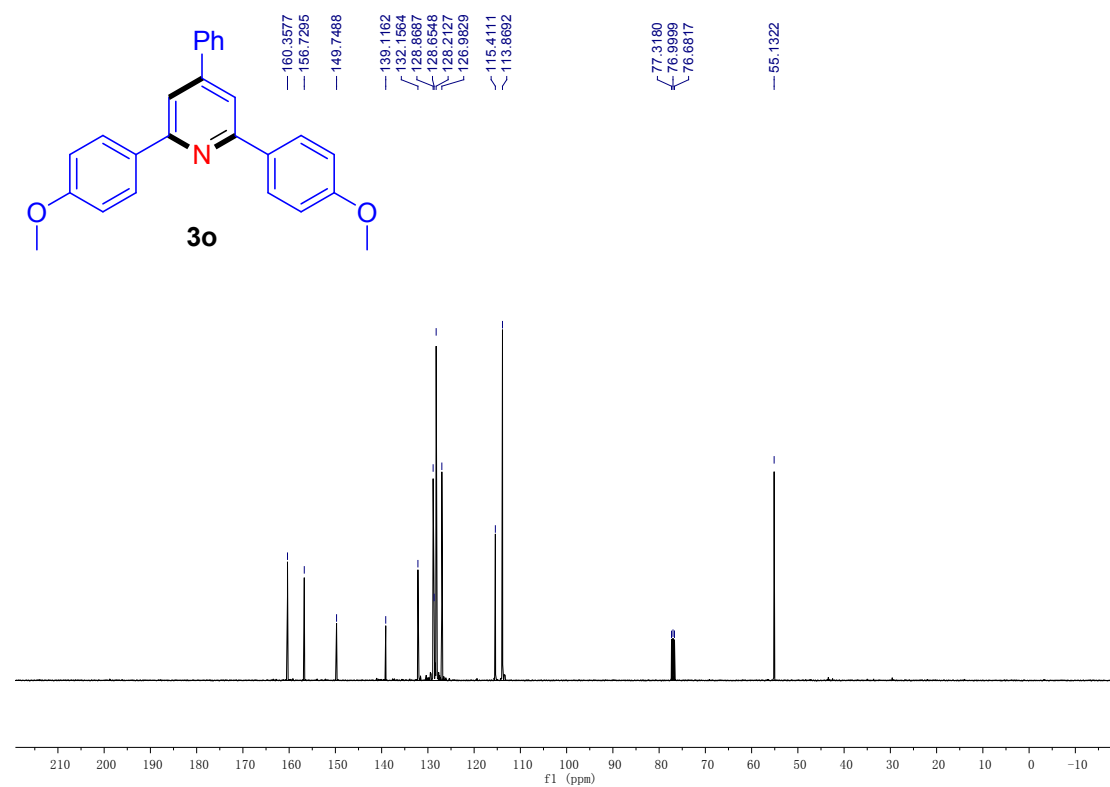



### <sup>1</sup>H NMR spectrum of **3p**

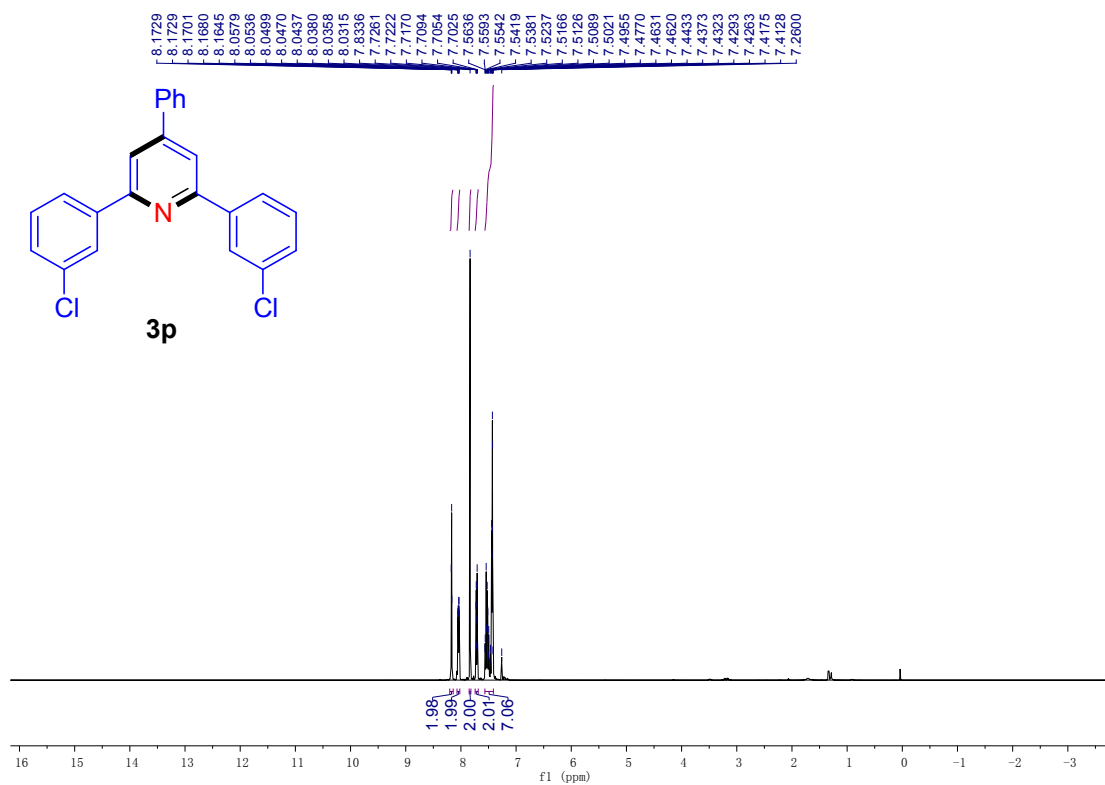

### <sup>13</sup>C NMR spectrum of **3p**

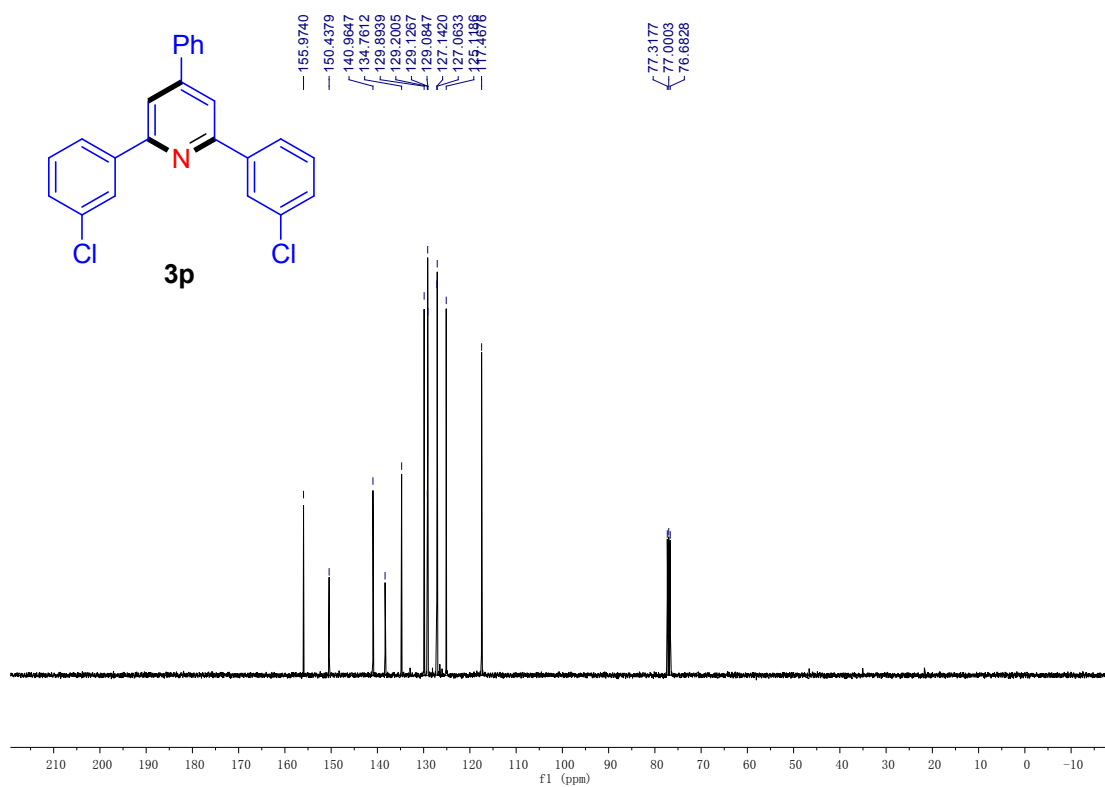

### $^1\text{H}$ NMR spectrum of **3q**

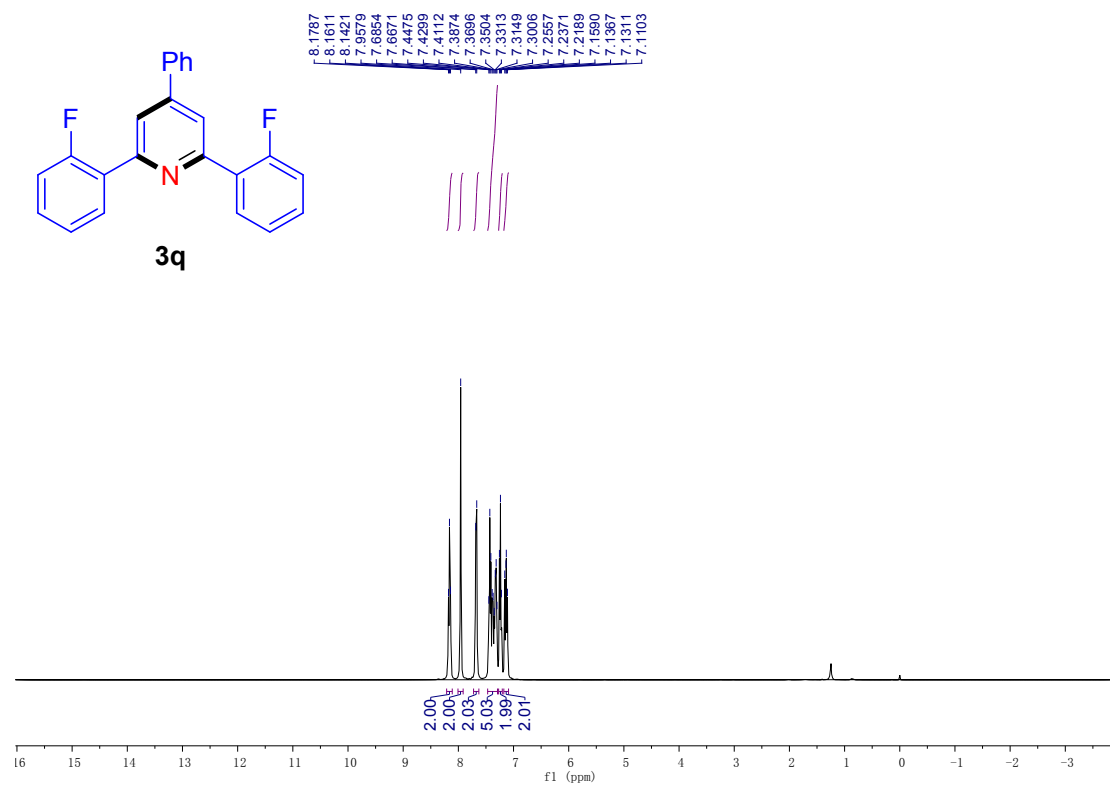

### $^{13}\text{C}$ NMR spectrum of **3q**

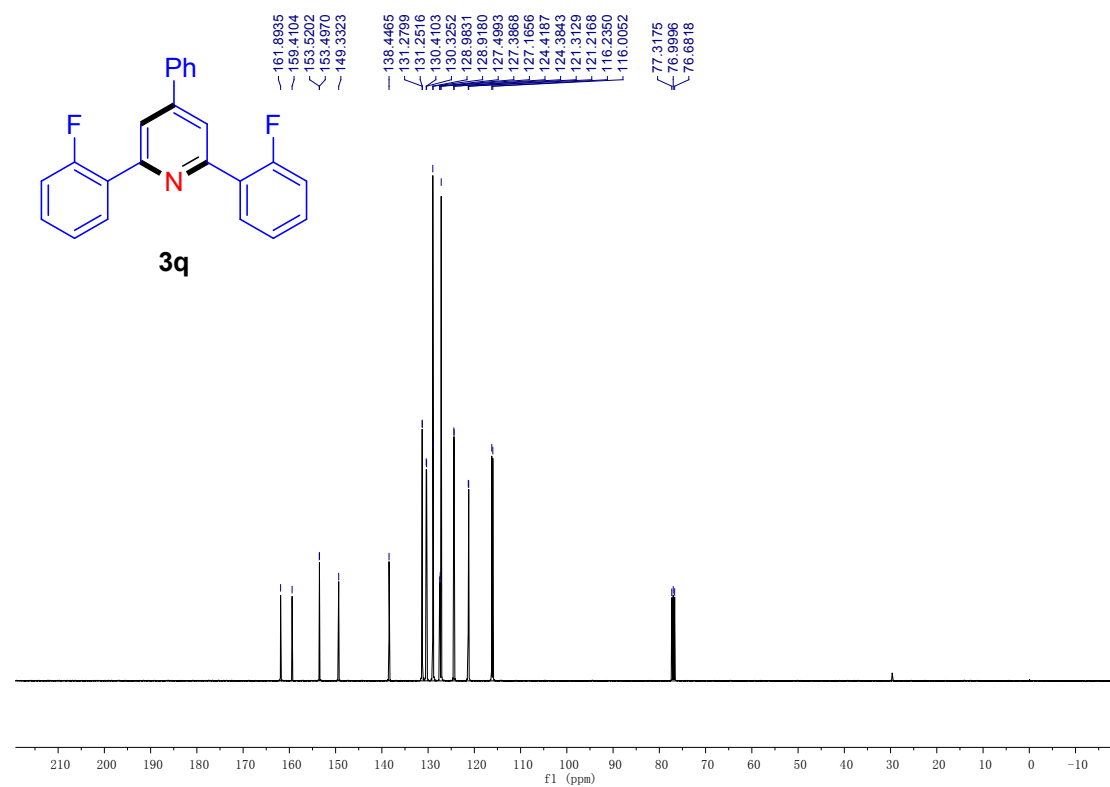

<sup>1</sup>H NMR spectrum of **3r**

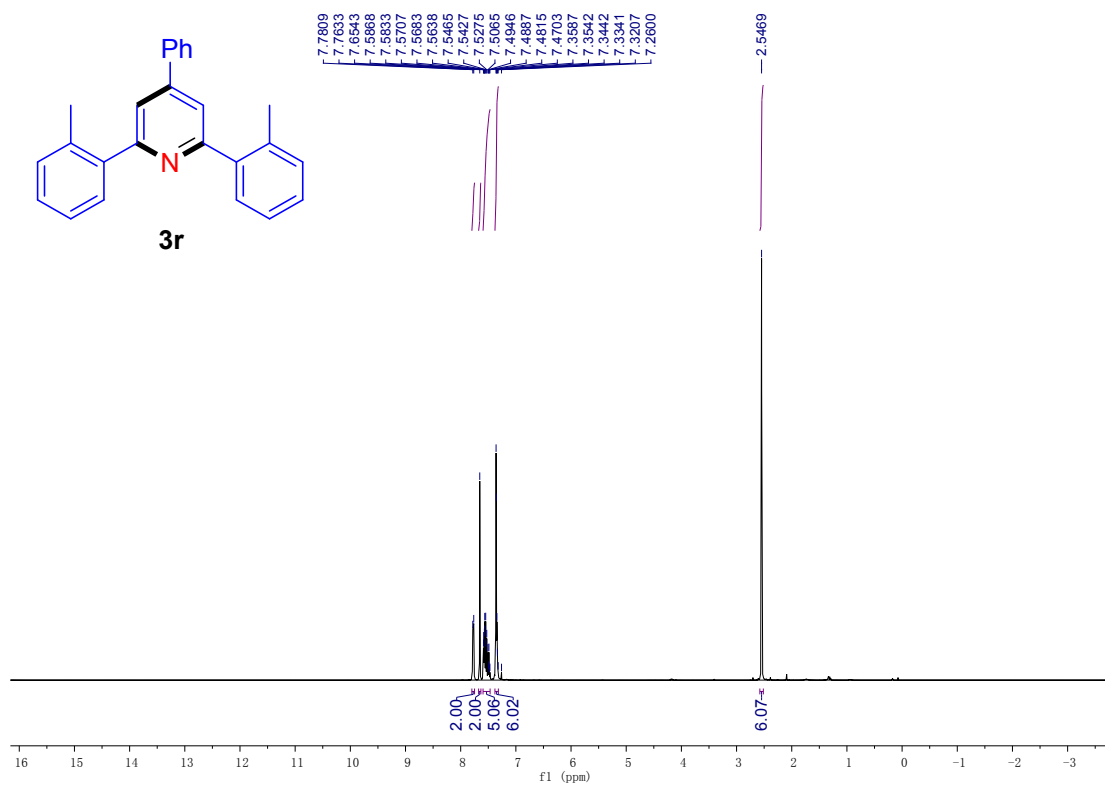

<sup>13</sup>C NMR spectrum of **3r**

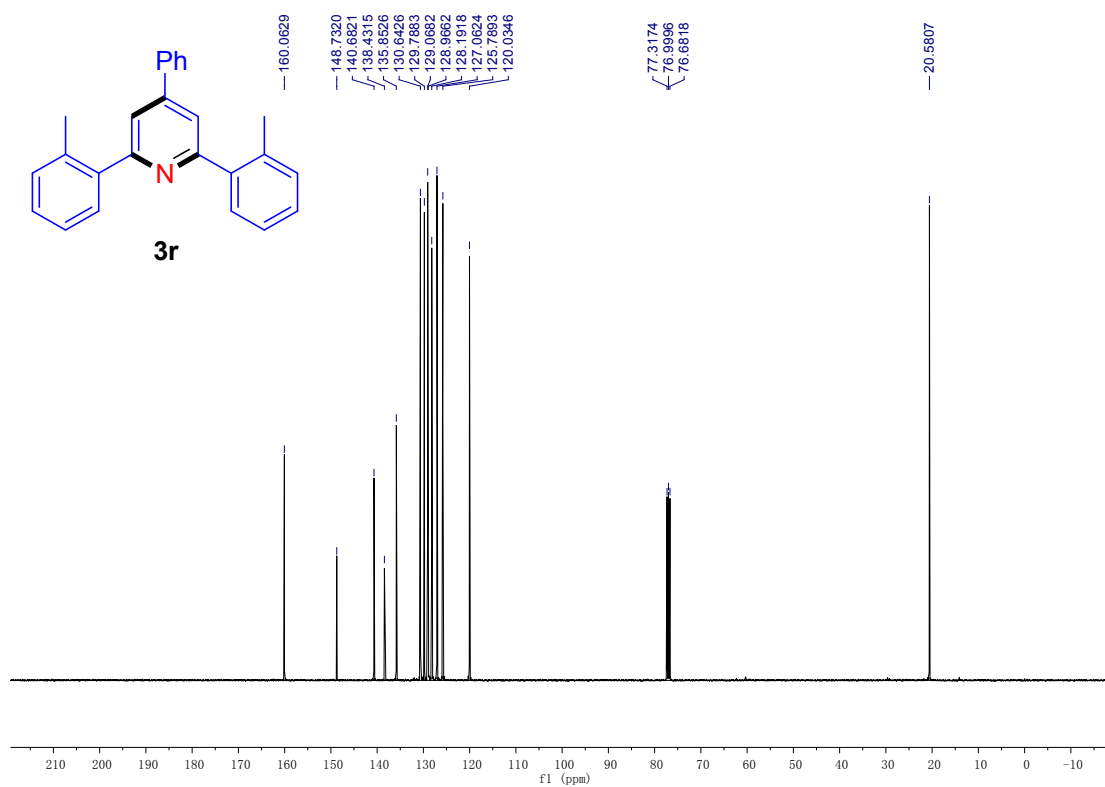

### $^1\text{H}$ NMR spectrum of **3s**

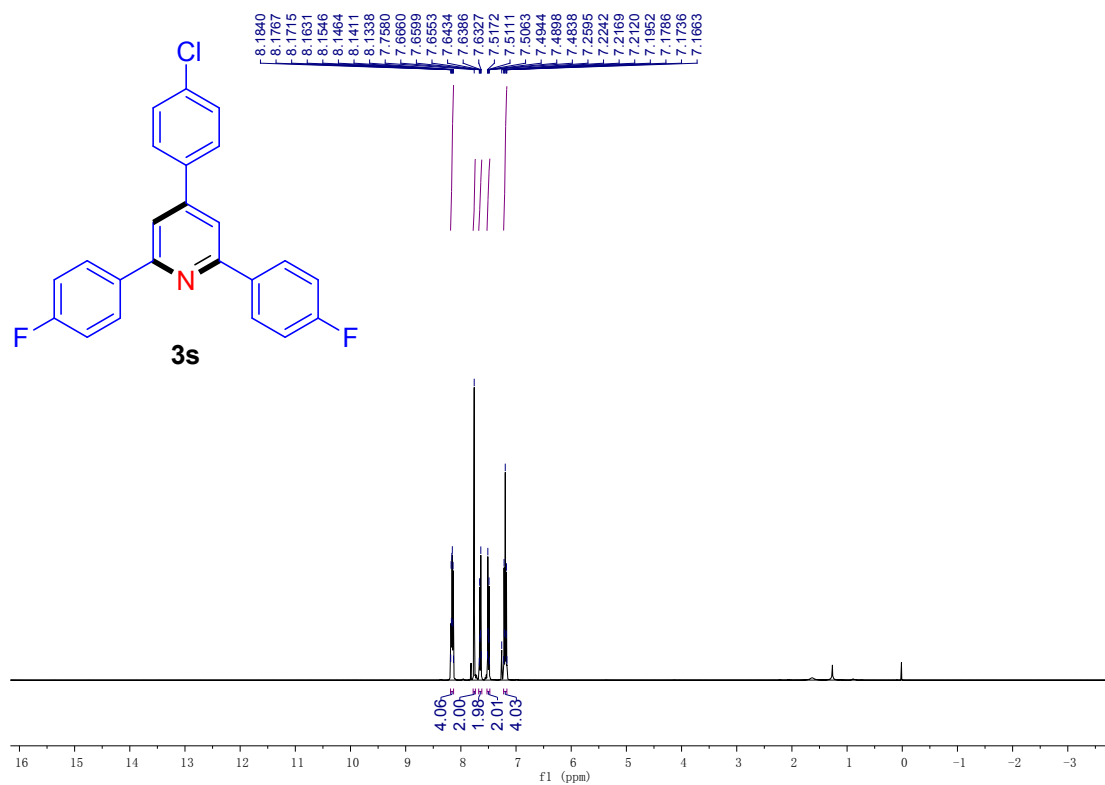

### $^{13}\text{C}$ NMR spectrum of **3s**

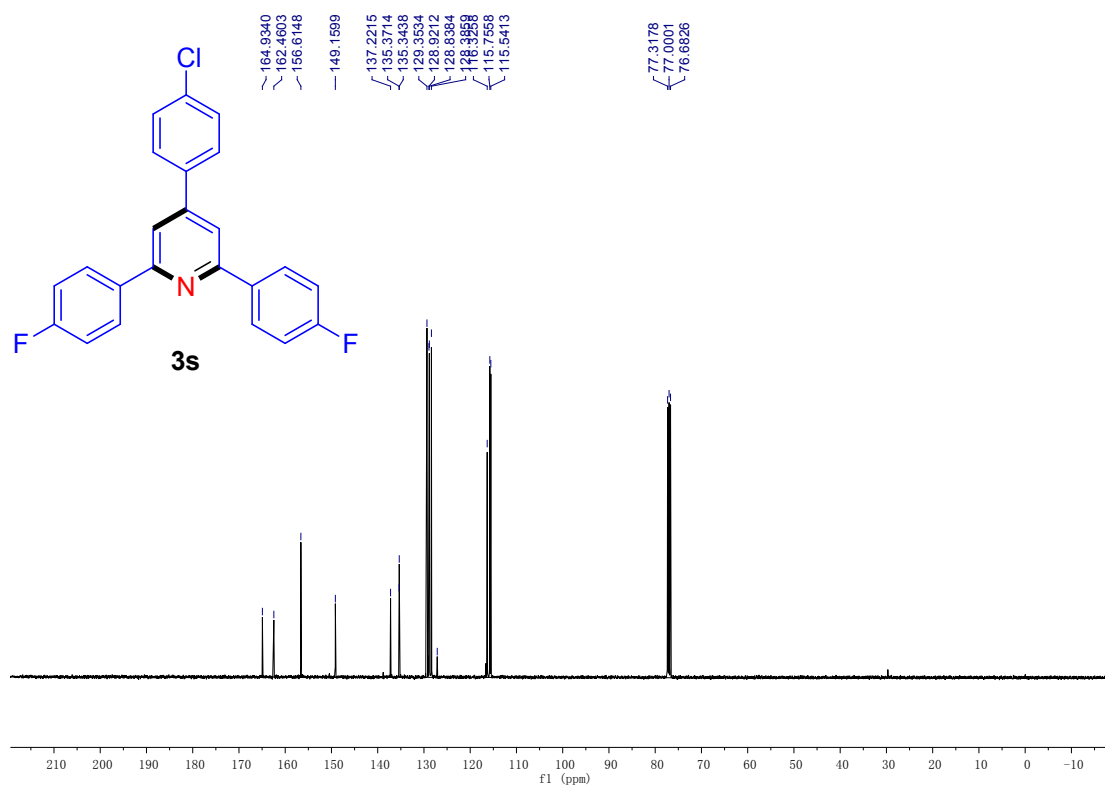

### $^1\text{H}$ NMR spectrum of **3t**

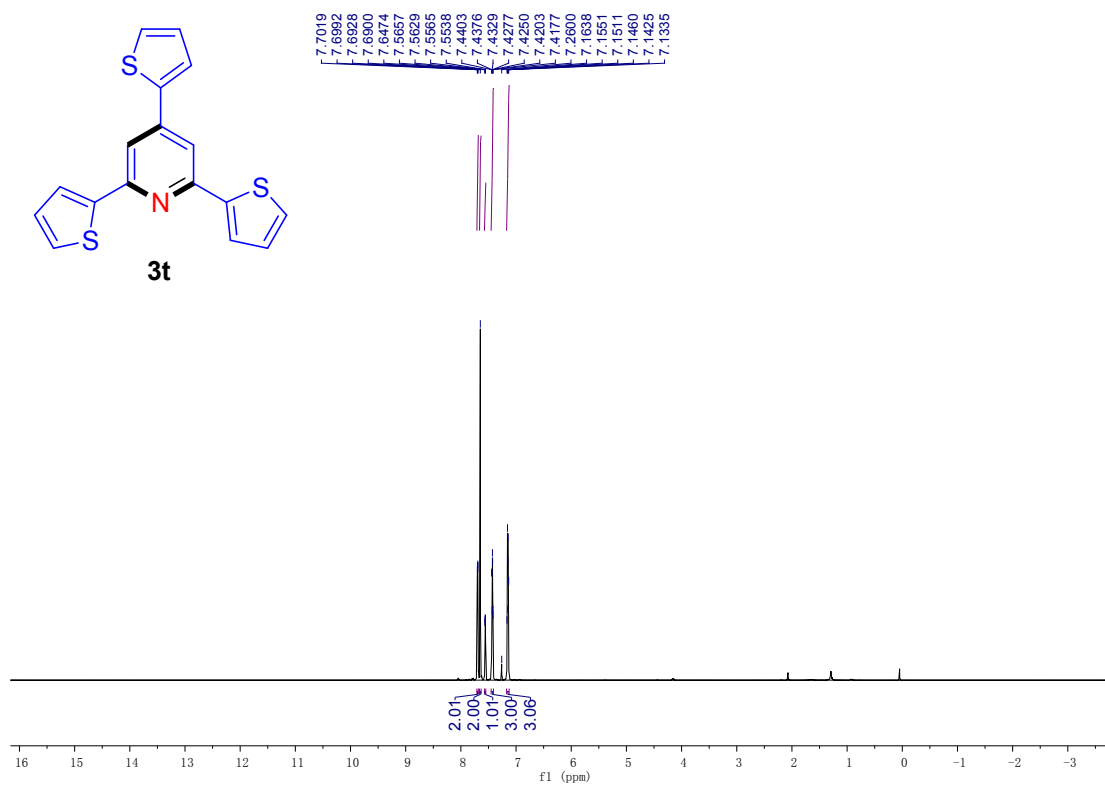

### $^{13}\text{C}$ NMR spectrum of **3t**

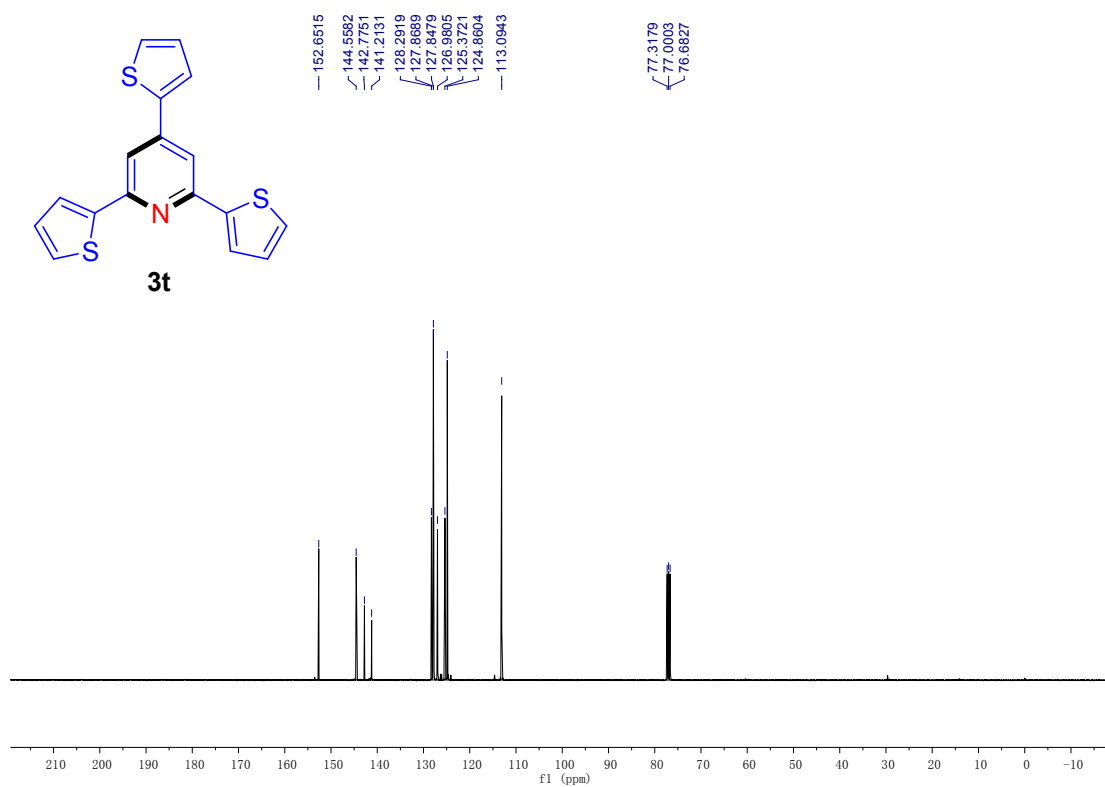

### <sup>1</sup>H NMR spectrum of **3u**

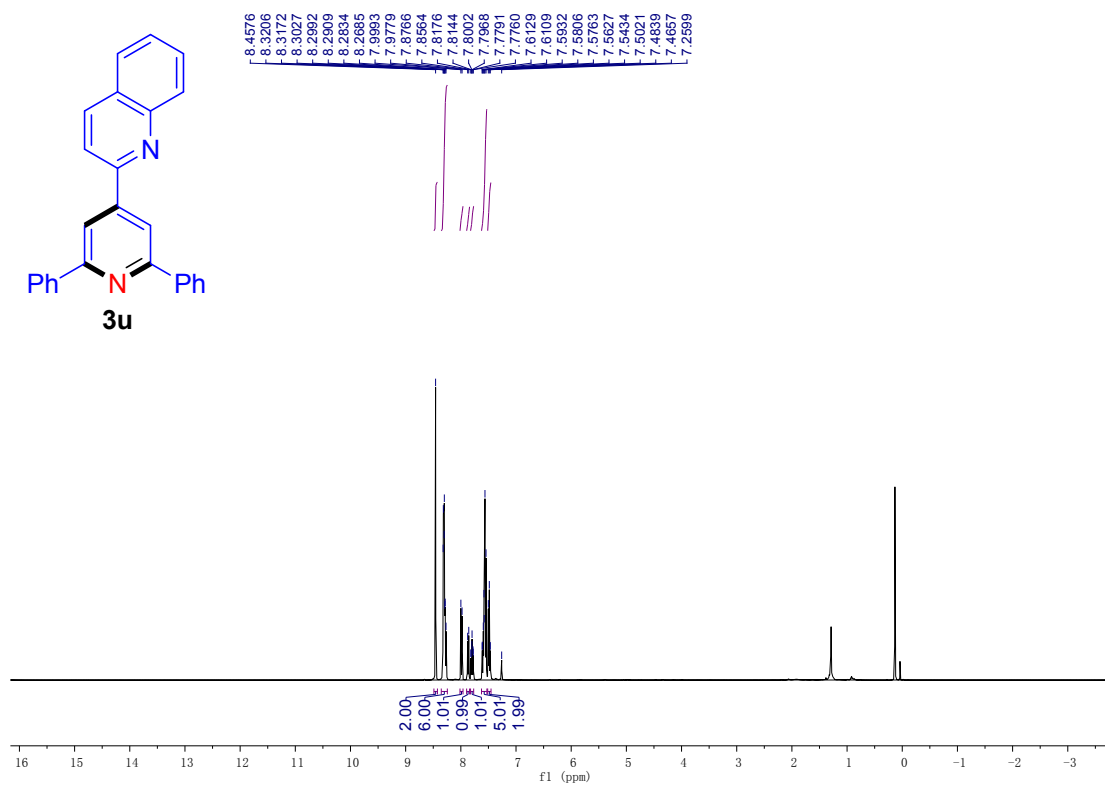

### <sup>13</sup>C NMR spectrum of **3u**

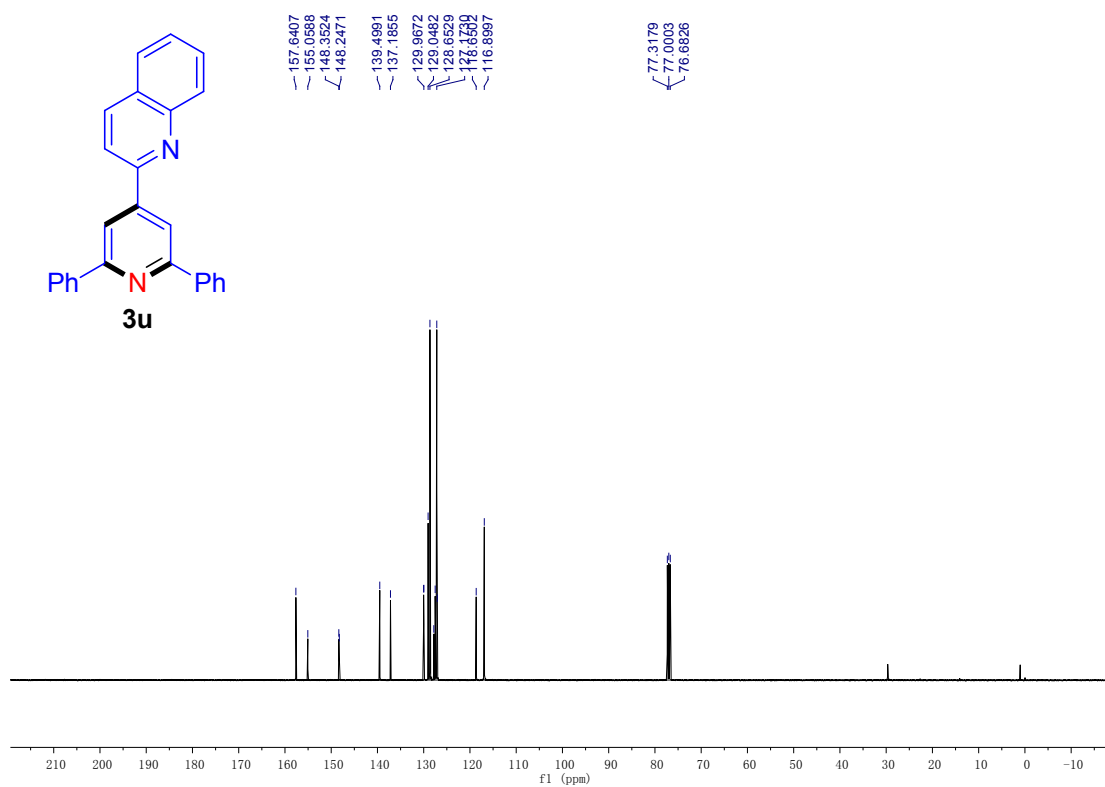

<sup>1</sup>H NMR spectrum of **3v**

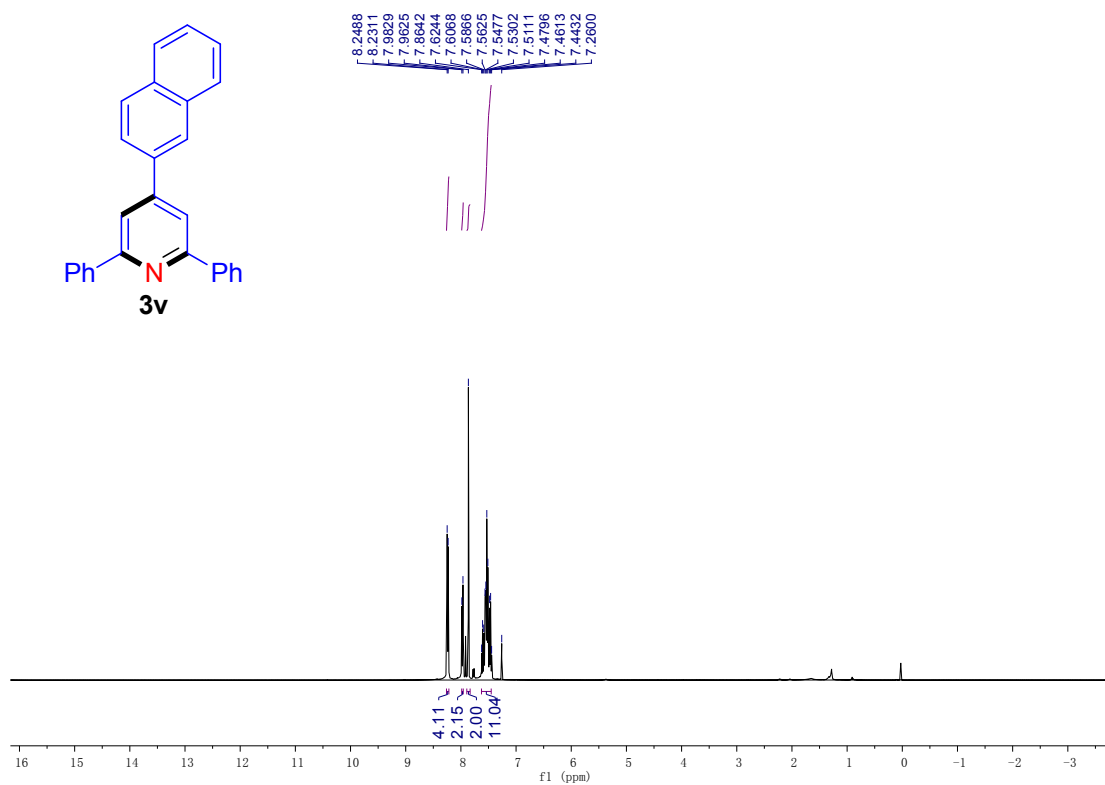

<sup>13</sup>C NMR spectrum of **3v**

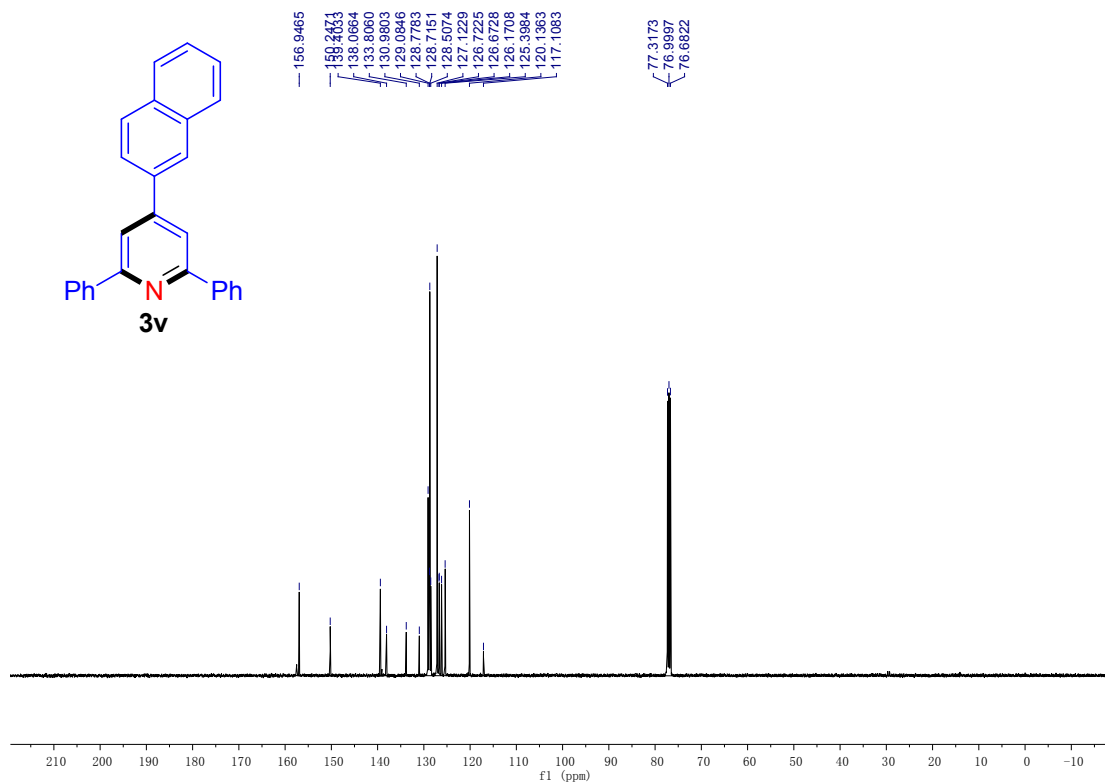

<sup>1</sup>H NMR spectrum of **3w**

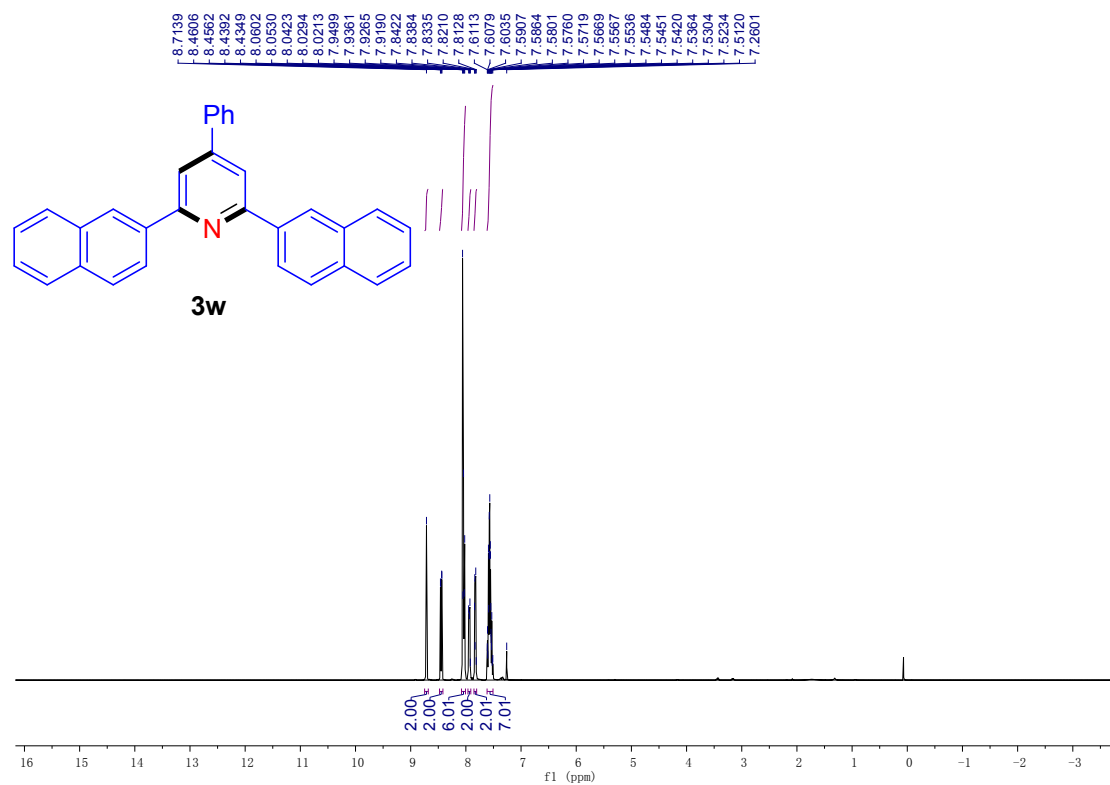

<sup>13</sup>C NMR spectrum of **3w**

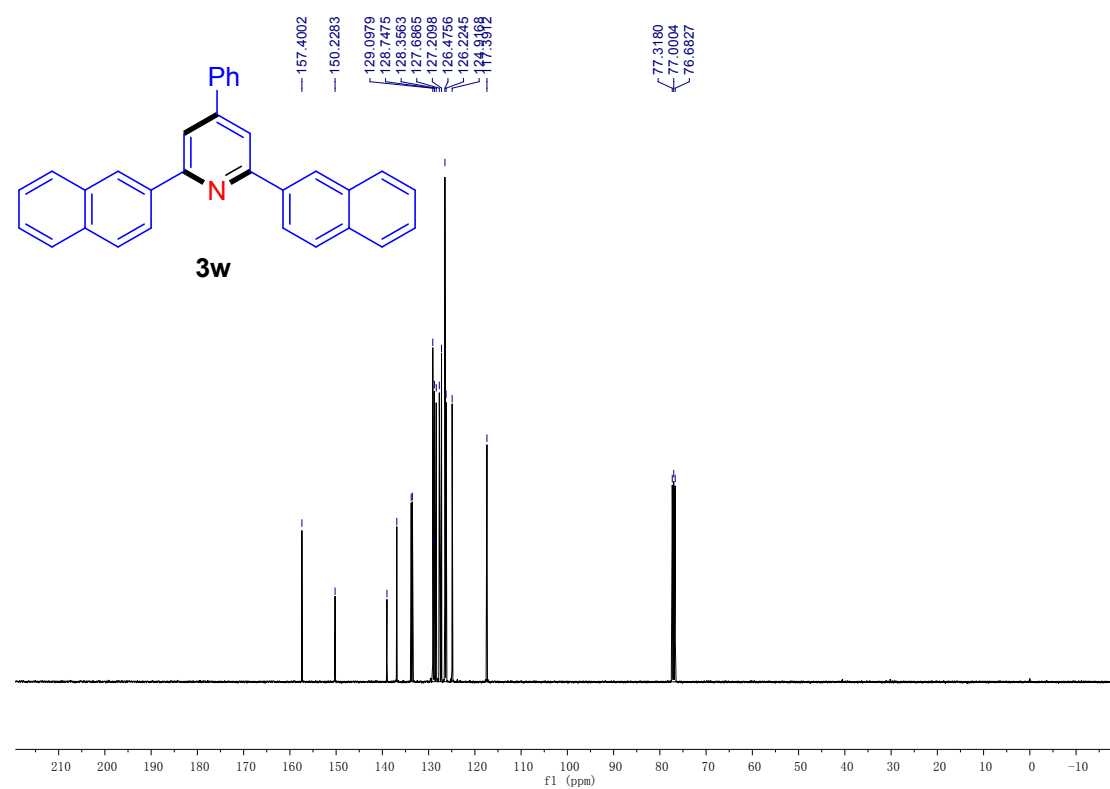



$^1\text{H}$  NMR spectrum of **3x**

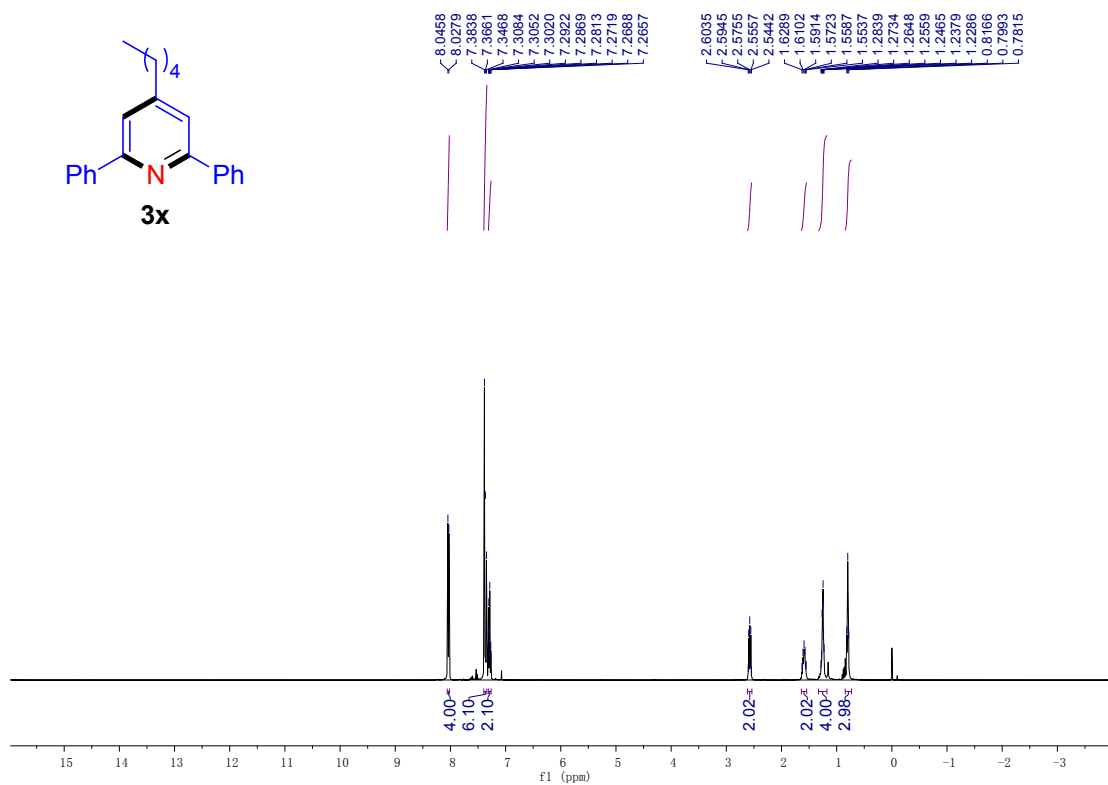

$^{13}\text{C}$  NMR spectrum of **3x**

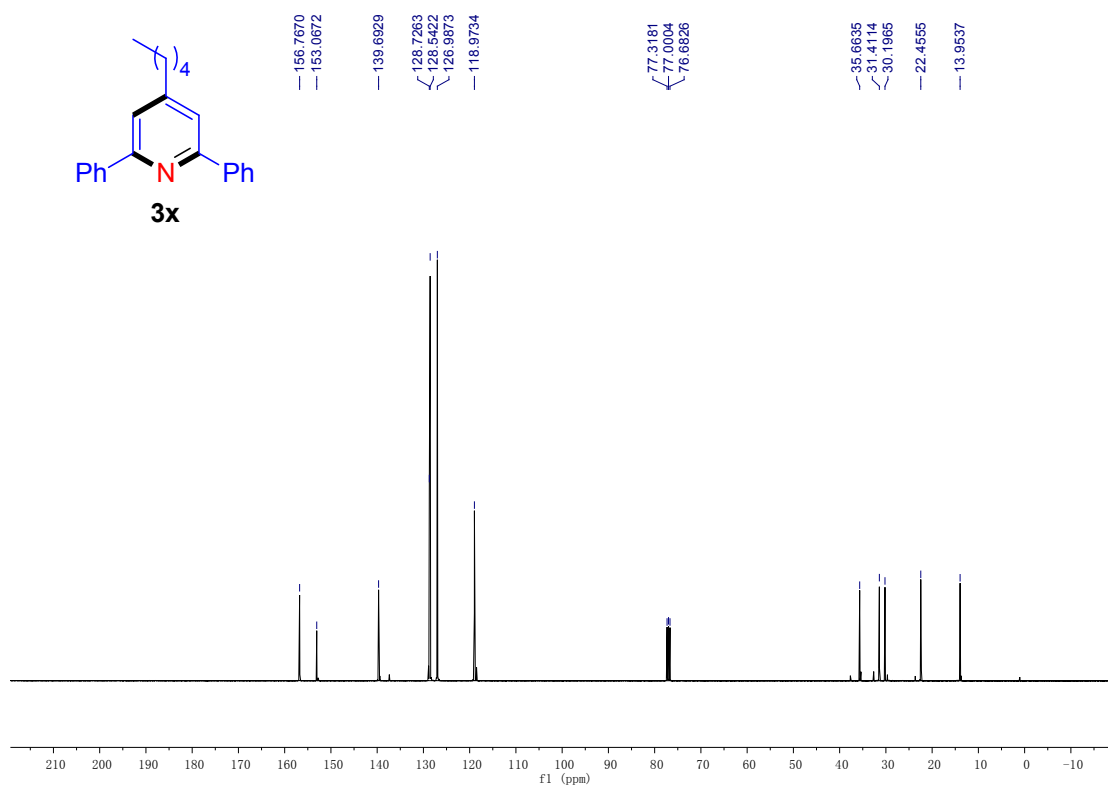

### $^1\text{H}$ NMR spectrum of **3y**

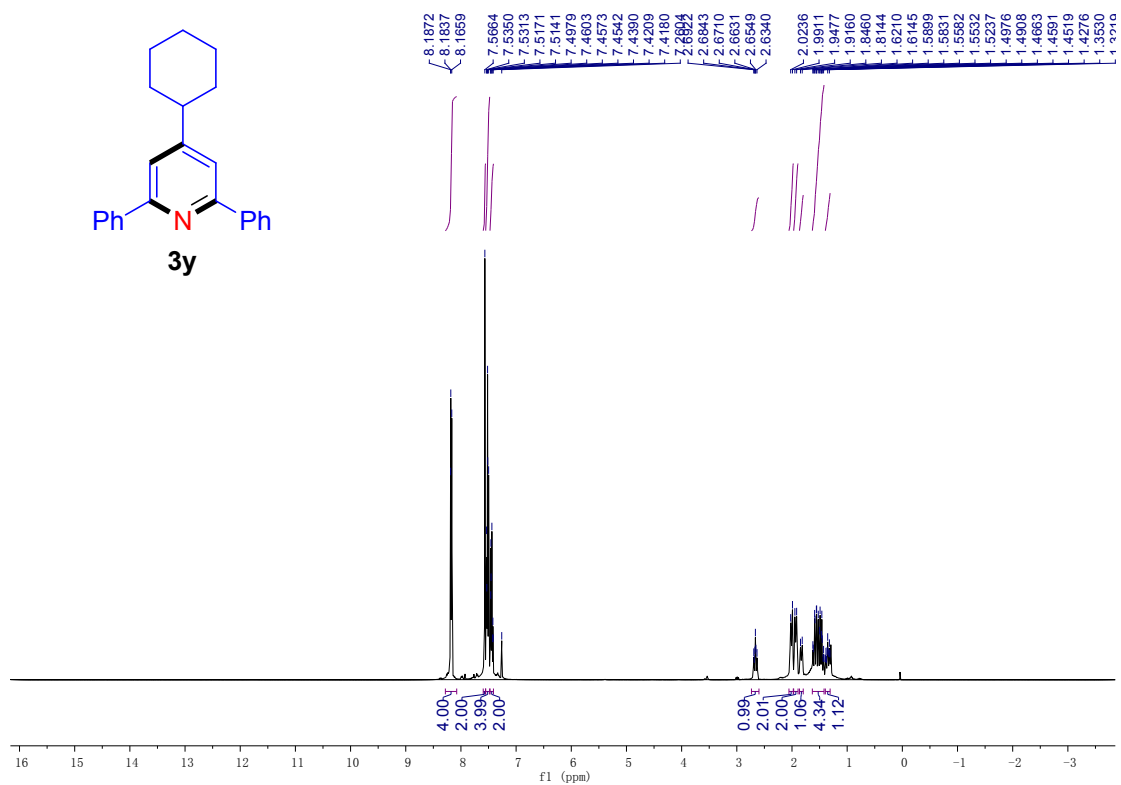

### $^{13}\text{C}$ NMR spectrum of **3y**

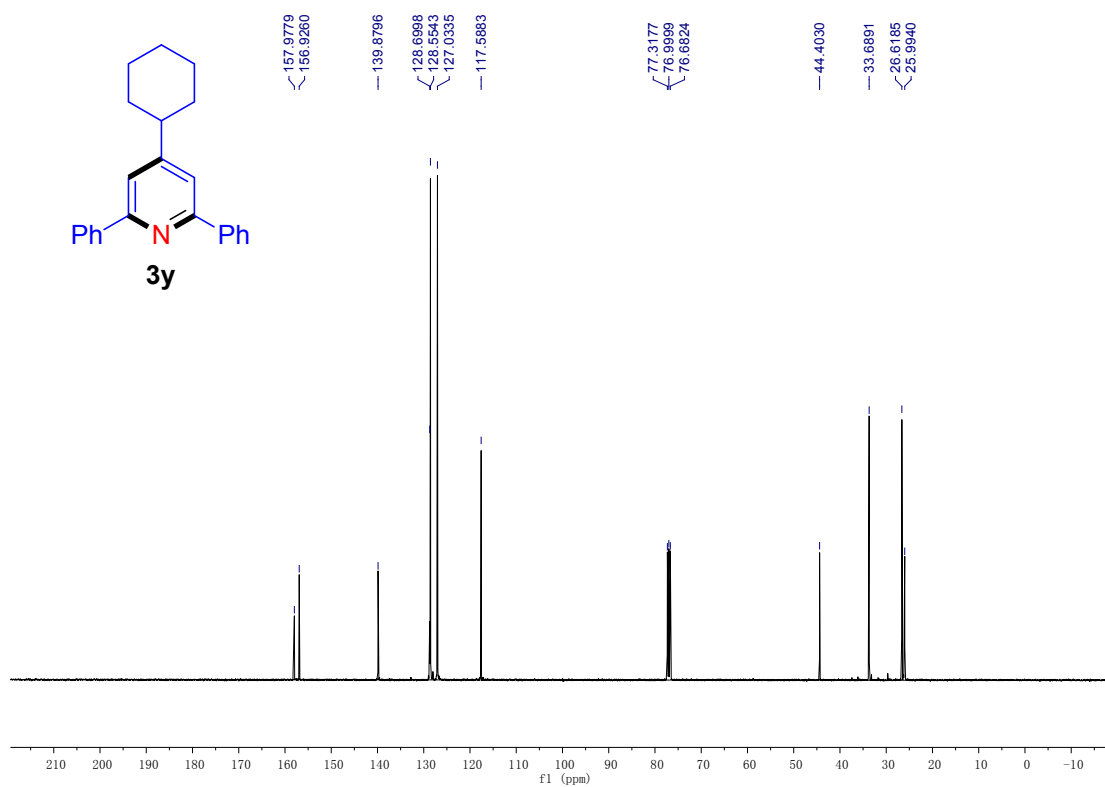

Supplement: c7ra00780a1.pdf [file c7ra00780a1.pdf]
